# Mathematical modeling of ventilator-induced lung inflammation

Sarah Minucci<sup>a</sup>, Rebecca L. Heise<sup>b</sup>, Michael S. Valentine<sup>b</sup>, Franck J. Kamga Gninzeko<sup>b</sup>, Angela M. Reynolds<sup>a,\*</sup>

<sup>a</sup>*Department of Mathematics & Applied Mathematics, Virginia Commonwealth University, Richmond, VA, USA*

<sup>b</sup>*Department of Biomedical Engineering, Virginia Commonwealth University, Richmond, VA, USA*

---

## Abstract

Respiratory infections, such as the novel coronavirus (SARS-COV-2) and other lung injuries, damage the pulmonary epithelium. In the most severe cases this leads to acute respiratory distress syndrome (ARDS). Due to respiratory failure associated with ARDS, the clinical intervention is the use of mechanical ventilation. Despite the benefits of mechanical ventilators, prolonged or misuse of these ventilators may lead to ventilation-associated/ventilation-induced lung injury (VILI). Damage caused to epithelial cells within the alveoli can lead to various types of complications and increased mortality rates. A key component of the immune response is recruitment of macrophages, immune cells that differentiate into phenotypes with unique pro- and/or anti-inflammatory roles based on the surrounding environment. An imbalance in pro- and anti-inflammatory responses can have deleterious effects on the individual's health. To gain a greater understanding of the mechanisms of the immune response to VILI and post-ventilation outcomes, we develop a mathematical model of interactions between the immune system and site of damage while accounting for macrophage polarization. Through Latin hypercube sampling we generate a virtual cohort of patients with biologically feasible dynamics. We use a variety of methods to analyze the results, including a random forest decision tree algorithm and parameter sensitivity with eFAST. Analysis shows that parameters and properties of transients related to epithelial repair and M1 activation and de-activation

---

\*areynolds2@vcu.edu

best predicted outcome. Using this new information, we hypothesize interventions and use these treatment strategies to modulate damage in select virtual cases.

*Keywords:* mathematical modeling, mechanical ventilation, immune response, macrophages

---

## 1. Introduction

Inflammation occurs in the lungs when an immune response is initiated to eliminate an insult. Types of insults include inhaled pathogens, such as pneumonia, tuberculosis, SARS-COV-2, or other harmful particles. In the most severe cases this leads to acute respiratory distress syndrome (ARDS). Due to respiratory failure associated with ARDS, the clinical intervention is the use of mechanical ventilation. When individuals have a severe form of COVID-19, the disease caused by SARS-COV-2, the disease can lead to respiratory failure and death of the patients. In a recent study, two-thirds of patients admitted for COVID-19 required mechanical ventilation [1].

Despite the benefits of mechanical ventilators, prolonged or misuse of these ventilators may lead to ventilation-induced lung injury (VILI). In this work we will focus on the tissue damage associated with mechanical ventilation and resulting immune cell recruitment. The damage caused to alveolar sacs (clusters of alveolar cells) during mechanical ventilation can lead to volutrauma (extreme stress/strain), barotrauma (air leaks), atelectrauma (repeated opening and closing of alveoli), and biotrauma (general severe inflammatory response). If the trauma increases, it can lead to multi-system organ failure [2, 3].

It has also been shown that the inflammatory response of the elderly is altered in the lungs and other areas [4, 5]. As compared to younger individuals, increased levels of circulating inflammatory cytokines and different immune cell function have been reported in older patients [6]. A 2003-2008 study conducted at Bridgeport Hospital reported that 4,238 out of 9,912 (42.8%) patients received mechanical ventilation for a median of two days. Mortality or discharge to extended-care facilities increased for each decade of age greater than 65 years [7]. Additionally, the case fatality rate for COVID-19 patients over 70 years old and over 80 years old was around 50.8% and 14.8% of the total number of deaths, respectively [8]. This is in agreement with other studies reporting higher rates of severe outcomes in patients with

COVID-19 aged 65 or older [9]. The change in the inflammatory response with patient age combined with the increased need for ventilation and increased mortality rate among the elderly stresses the need to investigate the influence of aging in VILI. The framework we have built here addresses VILI with various parameters and initial conditions that can be narrowed in future studies with data from different age groups and/or insults to explore dynamics and driving factors in various diseases related to age and/or outcome.

We used mathematical modeling to investigate the role of the pulmonary immune response and treatments in ventilator-induced damage. We adapted a model developed by Torres *et al.* for the innate immune response to bacteria, which accounts for macrophage polarization, by including epithelial dynamics and stretch-induced recruitment of immune cells [10]. We use this model to understand the mechanisms by which the immune system responds to damaged epithelial cells and the sensitivity of post-ventilation outcome to components of this complex process. We begin this study by analyzing the epithelial subsystem mathematically. This allows us to understand fixed point stability and how various parameters affect stability for the new portion of the model. The full model is a large system of ordinary differential equations with a large number of parameters and a variety of nonlinear dynamics. Allowing the parameters in the model to vary over biologically feasible ranges using Latin hypercube sampling simulates the variety of immune system dynamics that may be observed in patients. We organize disease progressions into three categories, healthy, moderate inflammation, and severe inflammation, based on the percentage of healthy epithelial cells. To determine what is driving differences in outcome, we use a variety of methods to analyze the resulting dynamics: 1) comparison of parameters associated with different outcomes, 2) random forest decision tree algorithm, which parses through the variety of predictors that may be particularly important in the immune response to VILI and 3) parameter sensitivity with eFAST, a variance-based method.

### 1.1. Biological background

The alveolar epithelium consists of alveolar type I and type II cells. Alveolar type I cells make up about 95% of the alveolar surface and are primarily responsible for facilitating gas exchange. Type II cells cover the other 5% of the surface and are important in the innate immune response. In the presence of damage, these cells proliferate to repair the epithelium and can also differentiate to type I cells [11, 12]. The extent to which the alveolar

68 epithelium is damaged is a useful indicator of the overall effects of a lung  
69 insult [13].

70 The immune response is divided into innate (non-specific) and adaptive  
71 (acquired) responses. Two of the most important innate immune cells are  
72 neutrophils and macrophages, which can be tissue-specific or recruited to  
73 the site upon damage. The innate response is always present and ready to  
74 defend against pathogens or other insults. On the other hand, the adaptive  
75 immune response includes B and T cells, which differentiate in such a way  
76 that they are effective at fighting specific pathogens. They are recruited by  
77 antigen-presenting cells, such as dendritic cells and macrophages, that are a  
78 part of the innate immune response.

79 In this work, we concentrate on the innate immune system when mod-  
80 eling VILI to gain a better understanding of the epithelial and immune cell  
81 interactions. Lung infection may lead to the need for mechanical ventilation  
82 and the resulting model could be adapted in the future to study mechanical  
83 ventilation with infection. Initially we consider a system in which the im-  
84 mune response is triggered by damage associated with the ventilator without  
85 infection.

86 One of the key components of this response is recruitment of macrophages  
87 from the bone marrow and bloodstream to the damaged area to support  
88 the population of resident alveolar macrophages. Macrophages send signals  
89 to other immune cells and aid in the process of eliminating dead cells and  
90 repairing damaged ones [14]. Phenotypes of macrophages can range from  
91 “pro-inflammatory” (M1) or “anti-inflammatory” (M2) based on their acti-  
92 vators and byproducts [15, 16]. Their pro-inflammatory behavior includes  
93 destroying pathogens, consuming damaged cells, and amplification of signal-  
94 ing. Their anti-inflammatory response, which counteracts pro-inflammatory  
95 behavior, promotes repair by producing anti-inflammatory cytokines and re-  
96 moving apoptotic neutrophils. A single macrophage may produce both pro-  
97 inflammatory and anti-inflammatory signals concurrently, which can make  
98 classification and identification of phenotype a difficult question.

99 Another important type of immune cell is the neutrophil, which responds  
100 quickly to pro-inflammatory signals sent from damaged epithelial cells and  
101 other resident cells. A small amount of neutrophils are found in the lungs  
102 in homeostasis. Additional neutrophils are recruited from bone marrow in  
103 response to pro-inflammatory signals from damaged epithelial cells and resi-  
104 dent macrophages during an insult in large numbers [17]. Neutrophils have  
105 phagocytic capabilities in the presence of invading pathogens, but in the

case of VILI without infection neutrophils recruit other immune cells such as macrophages through the production of pro-inflammatory agents such as proteinases and cytokines and contribute to the removal of damaged or dead tissue. An overabundance of neutrophils and their byproducts can cause further unnecessary damage [18]. Neutrophils are relatively short-lived; they become apoptotic and are removed by macrophages [17] or become necrotic in an uncontrolled death resulting in the release of cytotoxic material [19].

An imbalance in the pro- and anti-inflammatory responses can cause complications for the individual. Furthermore, an absence of immune cells can lead to immunodeficiency and a surplus of immune cells can result in chronic inflammation [17]. Thus, it is important to understand the immune response to lung injury and the interplay between various types of cells. It is also believed that macrophages play a significant role in the impact of aging on the immune response [6, 20, 21].

## 1.2. Mathematical background

Mathematical modeling is used to capture the complexities of the immune response to epithelial cell damage, including important feedback loops and nonlinearities. Analyzing the resulting model gives insight into the driving mechanisms of this system. An *in silico* approach allows us to simulate various scenarios or new treatments, especially when *in vivo* and *in vitro* experiments to explore possible interventions to improve outcomes for patients are difficult to perform. To our knowledge, no mathematical models have described M1/M2 interactions specific to the immune response to VILI. Many models have examined the immune response to bacterial and viral infections, such as pneumonia [22–24], tuberculosis [25–27], and influenza [28–30]. Additionally, models related to smoking and asthma [31–34], mechanical ventilation [35–42], and general inflammatory stress [4, 43] have been developed, but these models generally deal with the mechanics of the airways, including airflow, pressure, and gas exchange, and how these mechanics respond to inflammation and particle inhalation without accounting for the various cells types involved in the immune response. Models have also been developed to understand and analyze the molecular mechanisms that govern the phenotype switch that macrophages undergo from pro-inflammatory to anti-inflammatory, as well as other important subcellular pathways [29, 44, 45].

Common modeling approaches used in these papers include agent-based models [27, 31, 34], partial differential equations [42, 43], ordinary differential equations [22–25, 30, 32], and Boolean models [29]. Each technique has its

143 advantages and disadvantages, but we choose to model the inflammatory re-  
 144 sponse to VILI, specifically the resulting damage to epithelial cells, using a set  
 145 of coupled ordinary differential equations (ODEs), which we describe further  
 146 in the following section. Systems of ODEs are ideal for modeling dynamical  
 147 systems because of their ability to capture, with reasonable computation  
 148 times, the highly nonlinear behavior of the many immune cells, epithelial  
 149 cells and other mediators involved in the immune response to VILI. This  
 150 allows for mathematical and sampling approaches to be used to determine  
 151 key components of the the biological process being modeled.

## 152 2. Methods & Model Development

### 153 2.1. Epithelial subsystem

154 The primary focus of this model is to examine the effects of damage on  
 155 the alveolar epithelium, in particular alveolar type II cells, since they are  
 156 responsible for restoration of the epithelium. In this section we begin with a  
 157 simple model, concentrating on the novel aspect of incorporating epithelial  
 158 cells and relative damage due to inflammation. We then add variables to  
 159 more accurately model the dynamics within this system.

160 We begin with a small three-dimensional system of differential equations,  
 161 shown in Eqs (1)-(3), where  $E_h$  is the proportion of the local space filled by  
 162 healthy cells,  $E_d$  is the proportion of the local space filled by damaged cells,  
 163 and  $E_e$  represents dead cells or empty “space” that can be replaced/filled  
 164 with healthy cells. Each term represents a biological event explained by  
 165 the brackets above the term. This first model includes only the baseline  
 166 abilities of epithelial cells to proliferate and repair themselves in the pres-  
 167 ence of sustained damage. We do not explicitly model proliferating and  
 168 non-proliferating cells; the parameter  $p$  is modulated to reflect the general  
 169 mechanism by which neighboring epithelial cells renew surrounding “space”  
 170 (tracked by  $E_e$ ).

$$\frac{dE_h}{dt} = \overbrace{p(E_h + E_d)(E_e)}^{\text{Proliferation}} + \overbrace{rE_d}^{\text{Repair}} - \overbrace{sE_h}^{\text{Damage}} \quad (1)$$

$$\frac{dE_d}{dt} = -\overbrace{rE_d}^{\text{Repair}} - \overbrace{bE_d}^{\text{Death}} + \overbrace{sE_h}^{\text{Damage}} \quad (2)$$

$$\frac{dE_e}{dt} = \overbrace{p(E_h + E_d)(E_e)}^{\text{Proliferation}} + \overbrace{bE_d}^{\text{Death}} \quad (3)$$

171 Damage from stretch due to mechanical ventilation is represented by the  
 172 rate  $s$ , and causes healthy epithelial cells to become damaged. This general  
 173 term covers over-distension for any mode of ventilation. Some damaged cells,  
 174 depending on the severity of damage, have the ability to repair themselves,  
 175 returning from the  $E_d$  state back to  $E_h$ , represented by a baseline repair rate  
 176  $r$  [46]. Damaged cells may also decay naturally at a rate  $b$ .

177 The first terms in Eq (1) for  $E_h$ , and Eq (3) for  $E_e$ , account for pro-  
 178 liferation of the healthy and damaged cells into empty space. Note that  
 179 total local space is conserved:  $E_e + E_h + E_d = 1$ . Therefore, we can define  
 180  $E_e = 1 - (E_h + E_d)$  and rewrite this term, where it becomes the standard  
 181 logistic growth with a carrying capacity of 1, associated with 100% of space  
 182 being filled. Eliminating  $E_e$  gives rise to a two-dimensional system, Eqs  
 183 (4)-(5).

$$\frac{dE_h}{dt} = \overbrace{p(E_h + E_d)(1 - (E_h + E_d))}^{\text{Proliferation}} + \overbrace{rE_d}^{\text{Repair}} - \overbrace{sE_h}^{\text{Damage}} \quad (4)$$

$$\frac{dE_d}{dt} = -\overbrace{rE_d}^{\text{Repair}} - \overbrace{bE_d}^{\text{Death}} + \overbrace{sE_h}^{\text{Damage}} \quad (5)$$

184 Nearby epithelial cells and progenitor cells, stem cells that can differenti-  
 185 ate into specific types of epithelial cells only, perform this task. These cells  
 186 spread and replicate to fill the empty space left by dead epithelial cells [46–  
 187 48]. In this model we do not account for the progenitor cells. Therefore, we  
 188 only account for proliferation associated with local epithelial cells.

189 Stability analysis reveals that in the absence of stretch ( $s = 0$ ) and with  
 190 all positive parameters,  $(0, 0)$  is a saddle node and  $(0, 1)$  is a stable equilib-  
 191 rium with eigenvalues  $\lambda_1 = -r - b$  and  $\lambda_2 = -p$ . Given a nonzero initial



192 condition for damaged cells the epithelial cells subsystem will resolve to the  
193 fully repaired fixed point  $(0, 1)$ .

In the presence of sustained stretch ( $s > 0$ ), the  $E_d$  nullcline switches from a vertical line to a line with slope  $(r + b)/s$ . The second equilibrium point changes from  $(0, 1)$  to

$$(E_d^*, E_h^*) = \left( \frac{s^2(p - b) + ps(b + r)}{p(b^2 + r^2 + s^2 + 2br + 2bs + 2rs)}, \frac{(r + b)[s(p - b) + p(b + r)]}{p(b^2 + r^2 + s^2 + 2br + 2bs + 2rs)} \right)$$

194 Therefore in the presence of damage, there no longer exists an equilibrium  
195 associated with full recovery.

196 Exploratory simulations demonstrate that there is a bifurcation with  
197 respect to  $p$ , the proliferation rate of epithelial cells. A bifurcation dia-  
198 gram for this parameter, shown in Fig 1, has one transcritical bifurcation at  
199  $p^* = 0.497$ . The bifurcation diagrams in this manuscript were created using  
200 XPPAUT [49] with code included in the supplementary materials. In this  
201 figure, we show the proportion of space occupied by healthy epithelial cells  
202 as a percentage, which is  $E_h$  multiplied by 100. The second equilibrium for  
203 values of  $p$  below the bifurcation is not included in the diagram, since it is  
204 non-biological (negative  $E_h$ ). For small values of  $p$ , the ability of healthy cells  
205 to proliferate and replace dead cells is insufficient and damage causes both  
206 healthy and damaged cells to approach 0%. On the other hand, for values  
207 of  $p$  larger than  $p^*$ , the system approaches the stable nonzero equilibrium  
208  $(E_d^*, E_h^*)$ , which is closer to  $(0, 1)$  for higher values of  $p$  even in the presence  
209 of sustained damage.

## 210 2.2. Fixed immune response

211 Next we examine the roles of immune cells, especially neutrophils and  
212 macrophages, by adding several terms to Eqs (1) and (2). We first focused  
213 on dynamics with a fixed immune response, because when we work with the  
214 full model (described in the next section), we only consider parameter sets  
215 that give rise to steady-state solutions in the absence of ventilator-induced  
216 damage. Therefore, we decided to start our model development by analyz-  
217 ing  $E_h$  and  $E_d$  with immune cells as parameters before including their full  
218 dynamics. The modifications are shown in Eqs (6) and (7).



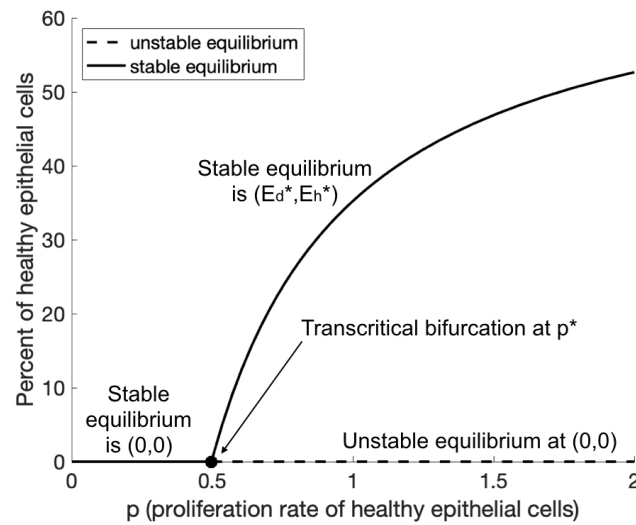

Figure 1: **The epithelial subsystem generates a transcritical bifurcation for the parameter  $p$ .** Bifurcation diagram for the proliferation parameter  $p$  for the epithelial system with stretch and no immune response. Other parameters are set to  $r = 2.6$ ,  $s = 0.22$ , and  $b = 0.74$ . The unstable equilibrium below  $p < p^* = 0.497$  is not included in the figure, since it is not biologically relevant.

$$\frac{dE_h}{dt} = \overbrace{p(E_h + E_d)(1 - (E_h + E_d))}^{\text{Proliferation}} + \overbrace{rE_d}^{\text{Repair}} - \overbrace{sE_h}^{\text{Damage}} - \overbrace{nE_h}^{\text{Collateral damage from neutrophils}} \quad (6)$$

$$\frac{dE_d}{dt} = -\overbrace{rE_d}^{\text{Repair}} - \overbrace{bE_d}^{\text{Death}} + \overbrace{sE_h}^{\text{Damage}} + \overbrace{nE_h}^{\text{Collateral damage from neutrophils}} - \overbrace{mE_d}^{\text{Removal of damaged cells by macrophages}} \quad (7)$$

219 The physical presence of immune cells, especially first-responder neu-  
 220 trophils, causes small-scale collateral damage as they clear debris [50] and  
 221 can be especially deleterious if the response is overzealous [18]. This biolog-  
 222 ical event is modeled as the last term in Eq (6) with cells switching from  
 223 a healthy to a damaged state at the rate  $n$ . M1 macrophages aid in the  
 224 clearance of damaged cells to make room for replacement by new, healthy  
 225 cells through subcellular signalling and phagocytosis [14, 47]. The last term  
 226 in Eq (7) represents this loss of damaged cells.

The stability analysis is similar to that from the model without the im-  
 mune response, with additional parameters  $m, n$  that can shift steepness of  
 the nullcline or the speed at which the system approaches or diverges from  
 an equilibrium. The parameter  $p$  once again plays an important role in the  
 stability of the two critical points,  $(0, 0)$  and

$$(E_d^*, E_h^*) = \left( \frac{(n + s)[(n + s)(p - b - m) + p(b + m + n)]}{p(b + m + n + r + s)^2}, \right. \\ \left. \frac{(b + m + r)[(n + s)(p - b - m) + p(b + m + n)]}{p(b + m + n + r + s)^2} \right)$$

227 There is a transcritical bifurcation when the value of  $p$  is varied; given  
 228 its similarly to Fig 1, it is not shown here. For the same parameter values  
 229 as in Fig 1 ( $r = 2.6, s = 0.22, b = 0.74$ ) with  $m = 0.92$  and  $n = 1.6$  added,  
 230 we obtain the same  $p^* = 0.497$ . The main difference between these models is  
 231 that the transcritical bifurcation point  $p^*$  may be lower because of the damage  
 232 resulting from macrophages and neutrophils, represented by  $m$  and  $n$ . The  
 233 rate of proliferation of healthy cells may need to be higher to counteract these  
 234 effects.

235 The bifurcation diagram for scaled  $E_h$  versus  $n$  also has a transcritical  
 236 bifurcation (see Fig 2a). For sufficiently low values of  $n$ , the nonzero critical

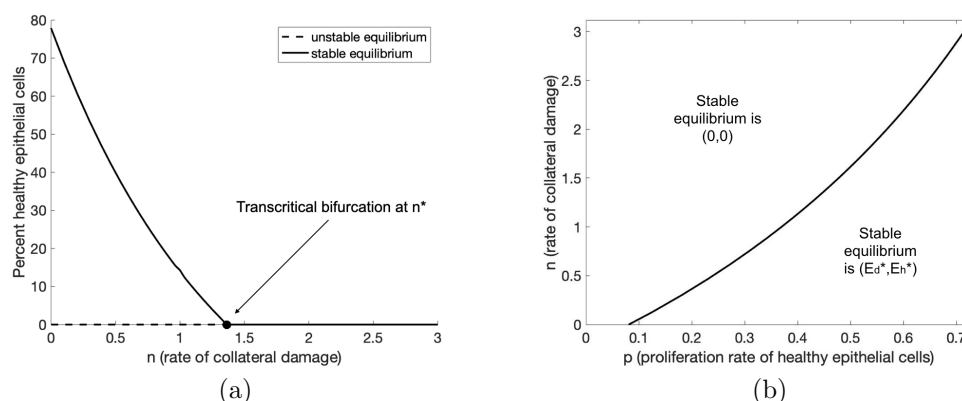

**Figure 2: Variations on the epithelial subsystem reveal a transcritical bifurcation and two-parameter bifurcation.** (a) Bifurcation diagram for epithelial subsystem when varying  $n$ . Other parameter values are set to  $r = 2.6$ ,  $p = 0.45$ ,  $s = 0.22$ ,  $b = 0.74$ ,  $n = 1.6$ ,  $m = 0.92$ . (b) Two-parameter plot showing values of  $p$  and  $n$  which cause the subsystem to have either a zero or nonzero stable equilibrium.

point is stable, but for values above  $n^* = 1.364$ ,  $(0, 0)$  is the stable equilibrium. Additionally, the two-parameter stability diagram shows a curve which separates the  $p/n$ -space into two stability regimes (see Fig 2b). For high enough values of  $n$  and low enough values of  $p$ , the system goes to zero for both variables. Biologically, this corresponds to a situation in which the ability of epithelial cells to proliferate is low and there are high levels of immune cells. On the other hand, with low levels of immune cells and a higher proliferation rate, the system limits to the nonzero equilibrium. It should be noted that for a large enough  $p$ , it would take an extremely high value of  $n$  to overpower proliferation and make  $(0, 0)$  the stable critical point. In the full system the initial conditions for our simulations will have similar properties to the type of steady state in the non-zero stable equilibrium region of Fig 2b. Varying levels of baseline inflammation exist given differences in patients' age and past medical history.

These simple models provide a framework for the dynamics of the epithelium in response to damage and an introductory look into the influence of the immune response. However, there are many more complex, nonlinear interactions and events involved in VILI which we will explore in the next section.

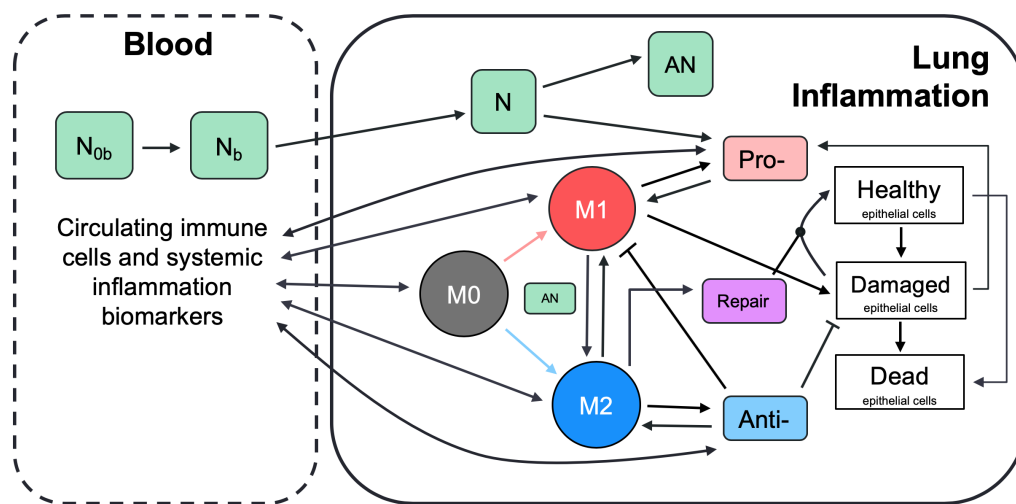

Figure 3: **Schematic describes interactions between immune system components.** Immune system components shown in this schematic are macrophages, neutrophils, various pro- and anti-inflammatory mediators, and epithelial cells. Green boxes represent various types of neutrophils, colored circles represent naive, M0, M1, and M2 macrophages. White boxes represent healthy, damaged, and dead epithelial cells/empty space ( $E_h$ ,  $E_d$ , and  $E_e$ , respectively). Other colored boxes represent various types of mediators that are produced by epithelial and/or immune cells and signal to immune cells. Unactivated immune cells become activated by various mediators ( $p_b$ ,  $a_b$  in the blood and  $p$ ,  $a$  locally) and perform either pro-inflammatory or anti-inflammatory roles which are meant to remove debris ( $E_e$ ) and promote repair of damaged epithelial cells. Dynamics between cells and mediators in the blood (not shown) are similar to the detailed dynamics shown for local inflammation.

### 2.3. Development of complete model

By adding variables to the two-dimensional system proposed above, we developed a system of coupled ordinary differential equations to model the interactions between immune cells, epithelial cells, and other mediators, shown in Fig 3. We also utilize a two-compartment method in which resident immune cells respond to the damaged epithelial cells and nonresident immune cells are recruited from the bloodstream.

A system of ODEs is ideal for modeling these interactions because of its ability to capture distinct nonlinearities and feedback loops with relatively low computational requirements. However, one of the drawbacks of an ODE model is that it assumes a well-mixed environment, in which all elements of the model are evenly distributed throughout the given space. Biologically,

this is not always the case. One way to include aspects of the spatial heterogeneity without explicitly modeling space is to use a compartmental model. Each compartment represents a well mixed environment and, when biologically appropriate, variables can move between compartments. An equation is developed for the component in each compartment in which it can be located.

Here we choose to model two compartments. The first is the site of inflammation in the lungs, specifically the epithelial cells which provide a barrier lining the alveolar cells. The second compartment is the adjacent blood vessel that provides additional immune support to the site of damage. Differentiating between these two compartments allows us to determine the concentrations of various immune cells and other mediators in each separate area and examine their movement across compartments. A two-compartmental model accounts for some spatial dynamics that a traditional system of ODEs cannot, making the model more realistic for a better understanding of the immune response to VILI.

Fig 3 gives a detailed breakdown of the dynamics in the lung. The dynamics are similar for those cells and mediators in the blood. Cell types that are tracked in each compartment are stated in Table 1. In the following subsections, we develop the equations for these variables. The parameters used in the equations are given in Table 2 with their description and range used during parameter sampling.

### 2.3.1. Epithelial cells

We continue with the convention of three subpopulations of epithelial cells, as in Eqs (6) and (7) with  $E_e = 1 - E_h - E_d$ . We add more details in Eqs (8), (9), and (10) to describe interactions with the immune response variables that we now explicitly model for a more accurate representation of the response to VILI. The first term in Eq (8) is still a logistic growth, representing epithelial cells that spread and replicate to fill  $E_e$ . This term appears negated in Eq (10), modeling the removal of empty space. The next term in Eq (8) and the first term of Eq (9) represents repair of damaged cells back to a healthy state. Epithelial cells are prone to self-repair [46], represented by a baseline rate  $b_r$ , and repair at a faster rate in the presence of repair mediators variable  $R$ , which tracks the level of mediators that promote epithelial repair such as fibronectin and other epithelial growth factors [48, 51, 52]. The third term in Eq (8) and second in Eq (9) represents collateral damage to epithelial cells by the influx and activity of the immune system. This mechanism is modeled via a nonlinear term, which is dependent on

| Bloodstream | Lung  | Description                       |
|-------------|-------|-----------------------------------|
|             | $E_h$ | Healthy epithelial cells          |
|             | $E_d$ | Damaged epithelial cells          |
|             | $E_e$ | Dead epithelial cells/empty space |
| $p_b$       | $p$   | Pro-inflammatory mediators        |
| $a_b$       | $a$   | Anti-inflammatory mediators       |
| $M_{0b}$    | $M_0$ | Unactivated macrophages           |
| $M_{1b}$    | $M_1$ | M1 pro-inflammatory macrophages   |
| $M_{2b}$    | $M_2$ | M2 anti-inflammatory macrophages  |
| $N_{0b}$    |       | Unactivated neutrophils           |
| $N_b$       |       | Activated neutrophils             |
|             | $N$   | Neutrophils                       |
|             | $AN$  | Apoptotic neutrophils             |
|             | $R$   | Repair mediators                  |

Table 1: State variables for the model. Variables in both columns represent cells or mediators that diffuse between the two compartments.

macrophage and neutrophil levels [14, 50, 53]. We also model damage due to stretch induced by the ventilator as  $s_d E_h$ , the fourth term in Eq (8) and fifth term in Eq (9), in which injury occurs at a rate proportional to the amount of healthy epithelial cells at a given time.

| Name          | Description                                                                                            | Range used                                  |
|---------------|--------------------------------------------------------------------------------------------------------|---------------------------------------------|
| $a_{b\infty}$ | Relative effectiveness of $a_b$ at inhibiting $M_{0b}$ differentiation to $M_{1b}$                     | [0.29, 67.35]                               |
| $a_{\infty}$  | Relative effectiveness of $a$ at inhibiting $M_0$ differentiation to $M_1$                             | [0.13, 72.08]                               |
| $b_d$         | Baseline decay of damaged cells                                                                        | $[1.06 \times 10^{-5}, 0.07]$               |
| $b_p$         | Baseline self-resolving repair of epithelial cells                                                     | [0, 6.20]                                   |
| $b_r$         | Baseline repair of damaged cells                                                                       | $[9.79 \times 10^{-3}, 4.47]$               |
| $d_a$         | Rate of diffusion for $a$                                                                              | [0.19, 177.98]                              |
| $d_p$         | Rate of diffusion for $p$                                                                              | $[0.34, 2.3 \times 10^3]$                   |
| $d_{m0}$      | Rate of diffusion for $M_0$                                                                            | [0.24, 275.55]                              |
| $d_{m1}$      | Rate of diffusion for $M_1$                                                                            | $[2.75 \times 10^{-3}, 19.8]$               |
| $d_{m2}$      | Rate of diffusion for $M_2$                                                                            | [0.14, 143.36]                              |
| $k_{am1}$     | Production rate of $a$ by $M_{1b}$ & $M_1$                                                             | [0.01, 18.01]                               |
| $k_{am2}$     | Production rate of $a$ by $M_{2b}$ & $M_2$                                                             | $[2.43 \times 10^{-3}, 1.67]$               |
| $k_{an}$      | Rate at which neutrophils become apoptotic                                                             | [0.01, 50.04]                               |
| $k_{anm1}$    | Rate of $M_1$ phagocytosis of $AN$                                                                     | $[1.32 \times 10^{-3}, 0.69]$               |
| $k_{anm2}$    | Rate of $M_2$ phagocytosis of $AN$                                                                     | $[2.71 \times 10^{-3}, 7.36]$               |
| $k_{em1}$     | Rate of phagocytosis of damaged cells by $M_1$                                                         | [0.01, 16.03]                               |
| $k_{en}$      | Rate of phagocytosis of damaged cells by $N$                                                           | [0.01, 16.03]                               |
| $k_{ep}$      | Rate of self-resolving repair mediated by $p$                                                          | [0, 4.30]                                   |
| $k_{er}$      | Rate of repair of damaged cells by $R$                                                                 | $[1.47 \times 10^{-3}, 1.08]$               |
| $x_{er}$      | Regulates effectiveness of repair of damaged cells by $R$ (Hill-type constant)                         | $[7.23 \times 10^{-3}, 4.13]$               |
| $k_{m0a}$     | Rate of differentiation of $M_0$ by $a$                                                                | [0.01, 89.07]                               |
| $x_{m0a}$     | Regulates effectiveness of differentiation of $M_0$ by $a$ (Hill-type constant)                        | [0.16, 136.83]                              |
| $k_{m0ab}$    | Rate of differentiation of $M_{0b}$ by $a_b$                                                           | [1.15, 436.59]                              |
| $x_{m0ab}$    | Regulates effectiveness of $a_b$ differentiation of $M_{0b}$ (Hill-type constant)                      | [0.16, 83.97]                               |
| $k_{m0ad}$    | Rate of recruitment of $M_{0b}$ by $a_b$                                                               | [0.34, 181.89]                              |
| $x_{m0ad}$    | Regulates effectiveness of recruitment of $M_{0b}$ by $a_b$ (Hill-type constant)                       | [0.01, 27.6]                                |
| $k_{m0p}$     | Rate of differentiation of $M_0$ by $p$                                                                | $[8.99 \times 10^{-3}, 37.2]$               |
| $x_{m0p}$     | Regulates effectiveness of differentiation of $M_0$ by $p$ (Hill-type constant)                        | $[1.17, 1.14 \times 10^4]$                  |
| $k_{m0pb}$    | Rate of differentiation of $M_{0b}$ by $p_b$                                                           | [0.05, 89.96]                               |
| $x_{m0pb}$    | Regulates effectiveness of differentiation of $M_{0b}$ by $p_b$ (Hill-type constant)                   | $[41.51, 2.92 \times 10^4]$                 |
| $k_{m0pd}$    | Rate of recruitment of $M_{0b}$ by $p_b$                                                               | $[4.57 \times 10^{-3}, 53.97]$              |
| $x_{m0pd}$    | Regulates effectiveness of recruitment of $M_{0b}$ by $p_b$ (Hill-type constant)                       | [0.24, 180.74]                              |
| $k_{m1p}$     | Rate of recruitment of $M_{1b}$ by $p_b$                                                               | [0.2, 92.81]                                |
| $x_{m1p}$     | Regulates effectiveness of recruitment of $M_{1b}$ by $p_b$ (Hill-type constant)                       | $[9.8 \times 10^{-3}, 1.69]$                |
| $k_{m2a}$     | Upregulation of $M_{2b}$ recruitment by $a$                                                            | [0.1, 219.93]                               |
| $x_{m2a}$     | Regulates effectiveness of $M_{2b}$ recruitment by $a$ (Hill-type constant)                            | [0.08, 94.84]                               |
| $k_{m2r}$     | Upregulation of $M_{2b}$ recruitment by $R$                                                            | $[3.61 \times 10^{-3}, 20.11]$              |
| $x_{m2r}$     | Regulates effectiveness of $M_{2b}$ recruitment by $R$ (Hill-type constant)                            | [0.01, 18.70]                               |
| $k_{man}$     | Rate of $M_1$ switch to $M_2$ by $AN$                                                                  | [0.01, 27.08]                               |
| $k_{mne}$     | Rate of collateral damage to epithelial cells by macrophages and neutrophils                           | $[1.12 \times 10^{-3}, 5.17]$               |
| $x_{mne}$     | Regulates effectiveness of macrophages and neutrophils to damage epithelial cells (Hill-type constant) | [0.03, 41.06]                               |
| $k_n$         | Rate of migration of $N_b$ to lung                                                                     | $[2.39 \times 10^{-3}, 3.54]$               |
| $k_{n0p}$     | Rate of activation of $N_b$ by $p$                                                                     | [0.01, 5.58]                                |
| $x_{n0p}$     | Regulates effectiveness of activation of $N_b$ by $p$ (Hill-type constant)                             | [0.03, 142.56]                              |
| $k_{pe}$      | Production rate of $p$ by $E_d$                                                                        | $[44.02, 1.12 \times 10^4]$                 |
| $k_{pm1}$     | Production rate of $p$ by $M_1$ & $M_{1b}$                                                             | [0.24, 412.22]                              |
| $k_{pn}$      | Production rate of $p$ and $p_b$ by neutrophils                                                        | $[1.67 \times 10^{-3}, 2.95]$               |
| $k_{rm2}$     | Production rate of $R$ by $M_2$                                                                        | [0.02, 40.97]                               |
| $\mu_a$       | Decay rate of $a$                                                                                      | $[5.16 \times 10^{-4}, 5.08]$               |
| $\mu_{ab}$    | Decay rate of $a_b$                                                                                    | [0.04, 12.86]                               |
| $\mu_p$       | Decay rate of $p$                                                                                      | $[2.76 \times 10^{-3}, 41.04]$              |
| $\mu_{pb}$    | Decay rate of $p_b$                                                                                    | $[4.79 \times 10^{-4}, 3.71]$               |
| $\mu_{m0}$    | Decay rate of $M_0$                                                                                    | [0.01, 42.67]                               |
| $\mu_{m0b}$   | Decay rate of $M_{0b}$                                                                                 | $[7.66 \times 10^{-3}, 329.59]$             |
| $\mu_{m1}$    | Decay rate of $M_1$                                                                                    | $[8.2 \times 10^{-3}, 10.16]$               |
| $\mu_{m1b}$   | Decay rate of $M_{1b}$                                                                                 | [0.03, 60.32]                               |
| $\mu_{m2}$    | Decay rate of $M_2$                                                                                    | [0.27, 135.37]                              |
| $\mu_{m2b}$   | Decay rate of $M_{2b}$                                                                                 | [0.02, 16.51]                               |
| $\mu_{nb}$    | Decay rate of $N_b$                                                                                    | $[2.49 \times 10^{-3}, 6.03]$               |
| $\mu_{n0b}$   | Decay rate of $N_{0b}$                                                                                 | $[3.94 \times 10^{-6}, 2.1 \times 10^{-3}]$ |
| $\mu_n$       | Decay rate of $N$                                                                                      | $[8 \times 10^{-3}, 4.32]$                  |
| $\mu_R$       | Decay rate of $R$                                                                                      | [0.72, 761.75]                              |
| $s_a$         | Source rate of background $a_b$                                                                        | $[5.75 \times 10^{-3}, 1.11]$               |
| $s_d$         | Rate of damage from ventilator                                                                         | 0.75                                        |
| $s_m$         | Source rate of $M_{0b}$                                                                                | $[1.28, 1.14 \times 10^3]$                  |
| $s_n$         | Source rate of $N_{0b}$                                                                                | [0.22, 225.45]                              |
| $s_p$         | Source rate of background $p_b$                                                                        | $[6.5 \times 10^{-4}, 9.4]$                 |

15  
Table 2: Model parameters with short descriptions and ranges used in LHS.



$$\begin{aligned} \frac{dE_h}{dt} = & \overbrace{(b_p + k_{ep}p)(E_h + E_d)E_e}^{\text{Proliferation of healthy cells, upregulated by PIM}} + \overbrace{E_d \left( b_r + \frac{k_{er}R}{x_{er} + R} \right)}^{\text{Baseline repair} + \text{Upregulation via repair mediators}} \\ & - \overbrace{E_h \left( \frac{k_{mne}(M_1 + N)^2}{x_{mne}^2 + (M_1 + N)^2} \right)}^{\text{Damage via M1 \& neutrophils}} - \overbrace{s_d E_h}^{\text{Damage from ventilator}} \end{aligned} \quad (8)$$

$$\begin{aligned} \frac{dE_d}{dt} = & - \overbrace{E_d \left( b_r + \frac{k_{er}R}{x_{er} + R} \right)}^{\text{Baseline repair} + \text{Upregulation via repair mediators}} + \overbrace{E_h \left( \frac{k_{mne}(M_1 + N)^2}{x_{mne}^2 + (M_1 + N)^2} \right)}^{\text{Damage via M1 \& neutrophils}} \\ & - \overbrace{k_{em1}M_1E_d}^{\text{Phagocytosis of damaged cells by M1}} - \overbrace{\left( \frac{1}{1 + \left( \frac{a}{a_\infty} \right)^2} \right)}^{\text{Inhibition by AIM}} - \overbrace{k_{en}NE_d}^{\text{Phagocytosis of damaged cells by N}} + \overbrace{s_d E_h}^{\text{Damage from ventilator}} - \overbrace{b_d E_d}^{\text{Death}} \end{aligned} \quad (9)$$

$$\begin{aligned} \frac{dE_e}{dt} = & - \overbrace{(b_p + k_{ep}p)(E_h + E_d)E_e}^{\text{Proliferation of healthy cells, upregulated by PIM}} + \overbrace{k_{em1}M_1E_d}^{\text{Phagocytosis of damaged cells by M1}} \overbrace{\left( \frac{1}{1 + \left( \frac{a}{a_\infty} \right)^2} \right)}^{\text{Inhibition by AIM}} \\ & + \overbrace{k_{en}NE_d}^{\text{Phagocytosis of damaged cells by N}} + \overbrace{b_d E_d}^{\text{Death}} \end{aligned} \quad (10)$$

309 M1 macrophages and neutrophils clear debris from the inflammation site  
 310 to make room for healthy epithelial cells to divide and fill the empty space  
 311 [17, 46, 47]. The third and fourth terms in Eq (9) represent this phago-  
 312 cytosis of damaged cells by M1 macrophages and activated neutrophils, re-  
 313 spectively. Regulation of M1 is modeled by the last multiplier in the term,  
 314 representing inhibition by anti-inflammatory mediators (AIM) such as IL-  
 315 10 [14, 48, 54]. The negative feedback loop of AIM inhibiting further pro-  
 316 inflammatory functions occurs frequently in our model in a number of equa-  
 317 tions described below, and we will heretofore refer to this multiplier as in-  
 318 hibition by AIM. Depending on the compartment, the term may utilize the

variable  $a_b$  (bloodstream) or  $a$  (local). The anti-inflammatory and regulatory role of M2 macrophages and the balance between M1 and M2 phenotypes is critical for a successful and rapid recovery [16, 48]. The last term of Eqs (9) and (10),  $b_d E_d$ , represents the death of  $E_d$  (negative in Eq 9) and the associated gain in the  $E_e$  population (positive in Eq 10)).

Dead epithelial cells and “empty” space are grouped together and modeled by the variable  $E_e$  in Eq (10). In the epithelial-only model,  $E_e$  was modeled as  $1 - E_h - E_d$ . Since mass is conserved in these three equations (the sum of terms in the epithelial differential equations is zero),  $E_e$  can be modeled either explicitly, as we chose in Eq (10), or in terms of  $E_h$  and  $E_d$ .

### 2.3.2. Pro- and anti-inflammatory mediators

As a signal to other immune cells, damaged epithelial cells release pro-inflammatory cytokines and other mediators, including TNF- $\alpha$  and matrix metalloproteinases (MMPs) [15, 46, 47]. In our equations, we group these pro-inflammatory mediators (PIM) into two state variables:  $p$  in the lungs and  $p_b$  in the blood. The release of PIM by damaged epithelial cells leads to diffusion of PIM into the bloodstream to recruit additional immune cells [47]. Movement between model compartments is driven by their difference in concentrations in both Eqs (11) and (12). This simple diffusion term will be used for other variables throughout our model.

M1 macrophages produce PIM, which upregulate the activation and migration of macrophages to the site of injury; see the second term in Eqs (11) and (12) [15, 48]. The macrophage population self-regulates by releasing AIM such as IL-10, thus inhibiting further production of PIM [45]. Therefore the term includes the same inhibiting multiplier as in Eq (9). The rate of PIM production by M1 macrophages decreases with increased concentrations of  $a_b$ .

Neutrophils are also important producers of pro-inflammatory mediators such as TNF- $\alpha$ , IL-1, IL-6, LTB4, and chemokines, which stimulate the activation of macrophages toward an M1 phenotype [17, 18, 52, 53, 55]. Low levels of PIM exist in the absence of damage, accounted for by the source term  $s_p$ , and we also model natural decay of these mediators.

$$\begin{aligned} \frac{dp_b}{dt} = & \underbrace{d_p(p - p_b)}_{\text{Diffusion}} + \underbrace{k_{pm1}M_{1b}}_{\text{Production via M1}} \underbrace{\left( \frac{1}{1 + \left( \frac{a_b}{a_{b\infty}} \right)^2} \right)}_{\text{Inhibition by AIM}} + \underbrace{k_{pn}N_b}_{\text{Production via neutrophils}} \\ & + \underbrace{s_p}_{\text{Background production}} - \underbrace{\mu_{p_b}p_b}_{\text{Decay}} \end{aligned} \quad (11)$$

$$\begin{aligned} \frac{dp}{dt} = & -\underbrace{d_p(p - p_b)}_{\text{Diffusion}} + \underbrace{k_{pm1}M_1}_{\text{Production via M1}} \underbrace{\left( \frac{1}{1 + \left( \frac{a}{a_\infty} \right)^2} \right)}_{\text{Inhibition by AIM}} + \underbrace{k_{pn}N}_{\text{Production via neutrophils}} \\ & + \underbrace{k_{pe}E_d}_{\text{Production via ep. damage}} - \underbrace{\mu_p p}_{\text{Decay}} \end{aligned} \quad (12)$$

351 Anti-inflammatory mediators, such as the anti-inflammatory signaling  
 352 caused by IL-4 and IL-10 [56], are represented by Eq (13) in the blood-  
 353 stream and Eq (14) at the site of damage. They follow the same simple  
 354 diffusion behavior as PIM, shown by the first term in each equation below.  
 355 AIM are released by both M1 and M2 macrophages [15, 48, 54]. Similarly to  
 356  $p_b$ , background levels of  $a_b$  are present in the absence of an immune response,  
 357 represented by term four in Eq (13). Natural decay of AIM is accounted for  
 358 by the last term in each equation.

$$\frac{da_b}{dt} = \underbrace{d_a(a - a_b)}_{\text{Diffusion}} + \underbrace{k_{am1}M_{1b}}_{\text{Production via M1}} + \underbrace{k_{am2}M_{2b}}_{\text{Production via M2}} + \underbrace{s_a}_{\text{Background production}} - \underbrace{\mu_{a_b}a_b}_{\text{Decay}} \quad (13)$$

$$\frac{da}{dt} = \underbrace{-d_a(a - a_b)}_{\text{Diffusion}} + \underbrace{k_{am1}M_1}_{\text{Production via M1}} + \underbrace{k_{am2}M_2}_{\text{Production via M2}} - \underbrace{\mu_a a}_{\text{Decay}} \quad (14)$$

### 359 2.3.3. Macrophages

360 Undifferentiated macrophages, also called naive or unactivated, are present  
 361 both locally and in the blood. The diffusion term, seen in Eqs (15) and (16),  
 362 represents movement between compartments. The baseline diffusion between  
 363 compartments is modeled in the same manner as with other variables, but

the rate at which this diffusion occurs is modulated by mediators. Increased PIM and AIM levels cause undifferentiated macrophages in the bloodstream to be recruited at a higher rate to the damaged site, where they become activated and perform phagocytic, pro-inflammatory, and pro-resolving roles [15]. This increased flux between compartments due to the presence of  $p_b$  and  $a_b$  is modeled by adding to the baseline diffusion rate ( $d_{m0}$ ). The added term is a Michaelis-Menten-type term to capture the increasing rate as mediators rise, with a maximum rate at which these cells can diffuse,  $(d_{m0} + k_{m0pd} + k_{m0ad})$ .

The equations also account for early activation in the bloodstream by PIM and AIM given a high enough concentration of these mediators [14]. Although there is still debate on the types of macrophages that exist in the bloodstream after being released from the bone marrow, there is evidence that populations of both M1 and M2 exist in the bloodstream before being recruited to the site of injury [15, 54]. Thus, we include this process in our equations in the second terms of Eqs (15) and (16). Undifferentiated macrophages in the bloodstream can change phenotype to M1 or M2 after interacting with PIM or AIM, respectively, modeled by a Hill-type term. This nonlinearity accounts for the sufficient amount of PIM or AIM necessary to precipitate activation as well as a saturation of this process.

Once pro-inflammatory mediators such as  $\text{TNF-}\alpha$ ,  $\text{TGF-}\beta$ , and interleukins (ILs) [47] are released by damaged epithelial cells, undifferentiated macrophages receive these signals and differentiate into the M1 phenotype [57]. A pro-inflammatory response characterizes the early stages of the immune response [48, 52]. The second term in Eqs 15 and 16 represent activation of undifferentiated macrophages to the pro-inflammatory phenotype, downregulated by the anti-inflammatory response through an inhibition multiplier. In this term, M2 macrophages can also be activated directly from the naive phenotype by various repair and anti-inflammatory mediators involved in the repair of epithelial cells [47, 48].

Using the same inhibition multiplier as previously, AIM inhibit differentiation to M1 as part of their regulatory role in the inflammatory process, although a complete understanding of these mechanisms is yet to be uncovered [15, 45, 47]. In the absence of injury, lungs contain a low number of undifferentiated macrophages which patrol the surrounding area [46]. “Patrolling” macrophages are also prevalent in the bloodstream. The third term in Eq (15) represents a constant source of undifferentiated macrophages from the circulation [48]. We also account for natural decay of all macrophage phenotypes in Eqs (15) through (20).

$$\begin{aligned}
 \frac{dM_{0b}}{dt} = & \overbrace{(M_0 - M_{0b}) \left( d_{m0} + \frac{k_{m0pd}p_b}{x_{m0pd} + p_b} + \frac{k_{m0ad}a_b}{x_{m0ad} + a_b} \right)}^{\text{Diffusion, upregulated by PIM \& AIM}} \\
 & - M_{0b} \left[ \overbrace{\left( \frac{k_{m0pb}p_b^2}{x_{m0pb}^2 + p_b^2} \right)}^{\text{Differentiation to M1 via PIM}} \overbrace{\left( \frac{1}{1 + \left( \frac{a_b}{a_{b\infty}} \right)^2} \right)}^{\text{Inhibition by AIM}} + \overbrace{\left( \frac{k_{m0ab}a_b^2}{x_{m0ab}^2 + a_b^2} \right)}^{\text{Differentiation to M2}} \right] \\
 & + \overbrace{s_m}^{\text{Source}} - \overbrace{\mu_{M_{0b}}M_{0b}}^{\text{Decay}}
 \end{aligned} \tag{15}$$

$$\begin{aligned}
 \frac{dM_0}{dt} = & - \overbrace{(M_0 - M_{0b}) \left( d_{m0} + \frac{k_{m0pd}p_b}{x_{m0pd} + p_b} + \frac{k_{m0ad}a_b}{x_{m0ad} + a_b} \right)}^{\text{Diffusion, upregulated by PIM \& AIM}} \\
 & - M_0 \left[ \overbrace{\left( \frac{k_{m0p}p^2}{x_{m0p}^2 + p^2} \right)}^{\text{Differentiation to M1 via PIM}} \overbrace{\left( \frac{1}{1 + \left( \frac{a}{a_{\infty}} \right)^2} \right)}^{\text{Inhibition by AIM}} + \overbrace{\left( \frac{k_{m0a}a^2}{x_{m0a}^2 + a^2} \right)}^{\text{Differentiation to M2}} \right] \\
 & - \overbrace{\mu_{M_0}M_0}^{\text{Decay}}
 \end{aligned} \tag{16}$$

402 Similarly to naive macrophages, M1 macrophages move between compart-  
 403 ments. The presence of pro-inflammatory mediators, which act as recruiters,  
 404 increases the rate of diffusion, shown in the first term of Eq (17) [15]. The sec-  
 405 ond term represents differentiation from the naive state, as described above.

406 Macrophages exhibit high plasticity, and based on the mediators and  
 407 other immune cells they encounter, they can switch phenotype and per-  
 408 form different or enhanced functions; this plasticity is not yet fully under-  
 409 stood [14, 48]. M1 macrophages are primarily responsible for producing  
 410 PIM, thereby recruiting other immune cells to the damaged area [54]. M2  
 411 macrophages are considered pro-resolving and downregulate PIM. Both M1  
 412 and M2 macrophages phagocytize apoptotic cells such as neutrophils [52].  
 413 The shift from an overall pro-inflammatory phase to an anti-inflammatory  
 414 phase in the course of the immune response is highly dependent upon a shift  
 415 in macrophage behavior, specifically the shift from a mainly M1 response to  
 416 a mainly M2 response [15, 47, 54].

One of the primary ways this shift is achieved is through the inhibition of M0 to M1 differentiation by anti-inflammatory mediators, as described previously. Additionally, when pro-inflammatory macrophages phagocytize apoptotic neutrophils, they shift towards a more anti-inflammatory phenotype. This results in suppression of the release of pro-inflammatory mediators and production of pro-resolving mediators [50, 53]. We account for this shift by including the third term in Eq (18), proportional to apoptotic neutrophil phagocytosis which causes M1 macrophages to shift to the M2 phenotype. This term also includes inhibition of M1 function by AIM. It has been shown in some studies that M2 macrophages can switch to an M1 phenotype [58], although this idea is not currently widely accepted. Thus, we choose to include only the shift from M1 to M2.

$$\begin{aligned} \frac{dM_{1b}}{dt} = & \overbrace{(M_1 - M_{1b}) \left( d_{m1} + \frac{k_{m1p}p_b}{x_{m1p} + p_b} \right)}^{\text{Diffusion, upregulated by PIM}} \\ & + M_{0b} \overbrace{\left( \frac{k_{m0pb}p_b^2}{x_{m0pb}^2 + p_b^2} \right)}^{\text{Differentiation to M1}} \overbrace{\left( \frac{1}{1 + \left( \frac{a_b}{a_{b\infty}} \right)^2} \right)}^{\text{Inhibition by AIM}} - \overbrace{\mu_{M_{1b}}M_{1b}}^{\text{Decay}} \end{aligned} \quad (17)$$

$$\begin{aligned} \frac{dM_1}{dt} = & - \overbrace{(M_1 - M_{1b}) \left( d_{m1} + \frac{k_{m1p}p_b}{x_{m1p} + p_b} \right)}^{\text{Diffusion, upregulated by PIM}} \\ & + M_0 \overbrace{\left( \frac{k_{m0p}p^2}{x_{m0p}^2 + p^2} \right)}^{\text{Differentiation to M1 via PIM}} \overbrace{\left( \frac{1}{1 + \left( \frac{a}{a_\infty} \right)^2} \right)}^{\text{Inhibition by AIM}} \\ & - \overbrace{k_{man}(k_{anm1}ANM_1)}^{\text{M1 switch to M2 by phagocytosis}} \overbrace{\left( \frac{1}{1 + \left( \frac{a}{a_\infty} \right)^2} \right)}^{\text{Inhibition by AIM}} - \overbrace{\mu_{M_1}M_1}^{\text{Decay}} \end{aligned} \quad (18)$$

M2 macrophages, associated with an anti-inflammatory response, can be activated directly from undifferentiated macrophages by specific anti-inflammatory signals in addition to switching phenotype from M1. They

diffuse between compartments as illustrated previously, shown in the first terms in Eqs (19) and (20). M2 macrophages produce anti-inflammatory mediators which recruit and promote differentiation to more M2 macrophages, described in the second term of both equations. They release cytokines that trigger the repair phase of the immune response [15, 48]. This repair phase includes repair mediators (discussed below in Eq (25)), which play a direct role in the reconstruction of healthy epithelial cells and resolution of damage [48].

$$\begin{aligned} \frac{dM_{2b}}{dt} = & \overbrace{(M_2 - M_{2b}) \left( d_{m2} + \frac{k_{m2r}R}{x_{m2r} + R} + \frac{k_{m2a}a}{x_{m2a} + a} \right)}^{\text{Diffusion}} \\ & + \overbrace{M_{0b} \left( \frac{k_{m0ab}a_b^2}{x_{m0ab}^2 + a_b^2} \right)}^{\text{Differentiation to M2}} - \overbrace{\mu_{M_{2b}}M_{2b}}^{\text{Decay}} \end{aligned} \quad (19)$$

$$\begin{aligned} \frac{dM_2}{dt} = & - \overbrace{(M_2 - M_{2b}) \left( d_{m2} + \frac{k_{m2r}R}{x_{m2r} + R} + \frac{k_{m2a}a}{x_{m2a} + a} \right)}^{\text{Diffusion}} + \overbrace{M_0 \left( \frac{k_{m0a}a^2}{x_{m0a}^2 + a^2} \right)}^{\text{Differentiation to M2}} \\ & + \overbrace{k_{man}(k_{anm1}ANM_1)}^{\text{M1 switch to M2 by phagocytosis}} \overbrace{\left( \frac{1}{1 + \left( \frac{a}{a_\infty} \right)^2} \right)}^{\text{Inhibition by AIM}} - \overbrace{\mu_{M_2}M_2}^{\text{Decay}} \end{aligned} \quad (20)$$

#### 2.3.4. Neutrophils

Neutrophils are considered the first responders to injury [18, 47]. Generated in the bone marrow [17], free-flowing neutrophils circulate in the vasculature at baseline levels, described as  $N_{0b}$  and represented by the first term in Eq (21) [18]. In the presence of injury, neutrophils are activated and recruited to the damaged site through pro-inflammatory mediators such as TNF- $\alpha$ , IL-1 $\beta$ , and other chemokines and cytokines [18, 55]. This recruitment is represented by the first term in Eqs (21) and (22). On the other hand, anti-inflammatory mediators, including macrophage-produced resolvins and protectins, inhibit further recruitment of neutrophils [50]. Similarly to the differentiation of macrophages, it is assumed that a higher concentration



above baseline is required for neutrophils to activate, and that this activation rate saturates. Therefore, a Hill-type term with a maximum rate of  $k_{n0p}$  and a constant of  $x_{n0p}$  is used to model activation of neutrophils by PIM. To model the inhibition of neutrophil activation by AIM, we include the same inhibition multiplier as previously described. The effectiveness of these AIMs to inhibit this process is controlled by  $a_{b\infty}$ . We also account for intrinsic decay of neutrophils in the last term of Eqs (21) through (24).

$$\frac{dN_{0b}}{dt} = - \overbrace{N_{0b} \left( \frac{k_{n0p} p_b^2}{x_{n0p}^2 + p_b^2} \right)}^{\text{Activation by PIM}} \overbrace{\left( \frac{1}{1 + \left( \frac{a_b}{a_{b\infty}} \right)^2} \right)}^{\text{Inhibition by AIM}} + \overbrace{s_N}^{\text{Source}} - \overbrace{\mu_{N_{0b}} N_{0b}}^{\text{Decay}} \quad (21)$$

$$\frac{dN_b}{dt} = \overbrace{N_{0b} \left( \frac{k_{n0p} p_b^2}{x_{n0p}^2 + p_b^2} \right)}^{\text{Activation by PIM}} \overbrace{\left( \frac{1}{1 + \left( \frac{a_b}{a_{b\infty}} \right)^2} \right)}^{\text{Inhibition by AIM}} - \overbrace{k_n N_b}^{\text{Migration}} - \overbrace{\mu_{N_b} N_b}^{\text{Decay}} \quad (22)$$

Neutrophils go through a multi-step process of rolling along and subsequently adhering to the surface of the endothelium. Then neutrophils transmigrate to the injury site either through or between endothelial cells [17, 18]. This process is assumed to be driven not by a concentration difference in neutrophils between the compartments but rather is a direct consequence of activation. Therefore, neutrophil transmigration, the first term in Eq (23), is modeled from the bloodstream to the site of injury by a linear term with rate  $k_n$ .

Activated neutrophils that have transmigrated through the endothelium and reached the site of injury release pro-inflammatory mediators, as discussed previously in Eq (12). During infection, neutrophils play an important role by phagocytizing pathogens [53], but during VILI a main role of neutrophils is the recruitment of macrophages, particularly to promote a more pro-inflammatory environment for the clearance of damaged and dead cells [18].

Neutrophils become apoptotic, modeled by the second term of Eq (23) [47]. In this state, they are phagocytized by M1 and M2 macrophages (second and third terms of Eq (24), respectively) and no longer contribute to the production of PIM [17, 52, 59]. Phagocytosis by M1 macrophages is inhibited by AIM using our standard functional form for the inhibition multiplier. AIM do not inhibit phagocytosis by M2 macrophages since AIM support the

479 function of anti-inflammatory cells. Intrinsic decay is described in the last  
480 term of Eq (23).

$$\frac{dN}{dt} = \overbrace{k_n N_b}^{\text{Migration}} - \overbrace{k_{an} N}^{\text{Transition to apoptotic}} - \overbrace{\mu_n N}^{\text{Decay}} \quad (23)$$

$$\frac{dAN}{dt} = \overbrace{k_{an} N}^{\text{Transition to apoptotic}} - \overbrace{k_{anm1} AN M_1}^{\text{Phagocytosis by M1}} \left( \overbrace{\frac{1}{1 + \left(\frac{a}{a_\infty}\right)^2}}^{\text{Inhibition by AIM}} \right) - \overbrace{k_{anm2} AN M_2}^{\text{Phagocytosis by M2}} \quad (24)$$

### 481 2.3.5. Repair mediators

482 The direct contribution of alveolar macrophages to the repair of epithelial  
483 cells is not completely understood, although macrophage involvement in the  
484 repair process has been widely demonstrated [48]. M2 macrophages produce  
485 various mediators that promote repair of epithelial cells. We do not model  
486 each of these explicitly, instead we group them together in one variable called  
487  $R$ . These secreted mediators include prostaglandin  $E_2$ , chemokines such as  
488 CCL2, TGF- $\beta$ , fibronectin 1 and other epithelial growth factors [48, 51, 52].  
489 The production of  $R$  by M2 macrophages is modeled by the first term in Eq  
490 (25). The second term models intrinsic decay of these mediators.

$$\frac{dR}{dt} = \overbrace{k_{rm2} M_2}^{\text{Upregulation by M2}} - \overbrace{\mu_R R}^{\text{Decay}} \quad (25)$$

491 With a system of ODEs that captures the most important aspects of  
492 the immune response to VILI, the following sections demonstrate how we  
493 analyzed the model to understand the parameter space, determine the most  
494 sensitive parameters and other influential predictors of model output, and  
495 modulate a particular case of model-generated dynamics to lessen long-term  
496 epithelial damage.

### 497 2.4. Sampling method for parameters: Latin hypercube sampling

498 Because of the large number of variables and parameters, mathematical  
499 and statistical techniques need to be used to analyze the system and find  
500 parameter sets that generate biologically realistic dynamics of immune cell

populations included in this model. Some parameters may be easily obtained from the literature, such as half-lives of immune cells. However, most of the parameters have not yet been evaluated due to the need for experimental data or are altogether impossible to obtain through current experimental methods. As an initial step towards determining initial conditions and parameters for this model we use Latin hypercube sampling (LHS). Introduced in 1979 [60], LHS is a sampling method which generates random, unique parameter sets, such that the produced parameter values are selected according to a distribution; in our case, a uniform distribution. For LHS with uniform distributions assumed for each parameter, to generate  $n$  desired parameter sets, the algorithm splits the determined range into  $n$  evenly-spaced subintervals and each interval is sampled exactly once [61]. This is particularly useful for our exploratory simulations because the distributions of the parameters are unknown.

Using MATLAB functions adapted from Kirschner *et al.* [62], all parameters were sampled except the rate of damage  $s_d$  due to ventilation. We used simulations to explore parameter space by sampling near transients associated with different types of disease progression. We accepted parameter sets if they were associated with a steady state solution and defined the final parameters ranges based on the maximum and minimum value of the parameters in the acceptable sets. See Table 2 for ranges used for each parameter. Using LHS with these ranges we generated 100,000 parameter sets. Future work could calibrate cohorts to data from different experimental or clinical groups and then use the analysis methods here to compare dynamics and parameters that drive differences between experimental or clinical groups.

## 2.5. Cohorts: Healthy, Moderate Inflammation, & Severe Inflammation

We needed to start our simulation from initial conditions associated with a steady state, so that when ventilation was simulated we were seeing changes in the dynamics only due to the ventilator. For all 100,000 parameter sets we ran the model for 800 hours without ventilator-induced damage ( $s_d = 0$ ) using three different initial conditions to determine if a steady-state condition was reached in the absence of ventilation. The first initial condition was related to the initial simulations used to develop the sampling ranges and gave rise to 25,195 sets that reached steady state. Additionally, we checked whether parameter sets that did not reach a steady state from these initial conditions could reach a steady state from an initial condition with all variables set to zero except for  $E_h(0) = 0.75$  and  $E_d(0) = 0.25$  (starting with

damaged tissue and no immune response) or initial conditions with all variables set to zero except for  $M1(0) = 50$  (starting with an activated immune response and healthy tissue). These other initial conditions added another 1,104 sets that reached a steady state, bringing the total to 26,299. Any parameter sets that did not result in an equilibrium state by 800 hours from these three initial conditions were not simulated with ventilation. We simulated these 26,299 parameter sets with ventilator-induced damage starting from their steady state levels. Simulations were run for 200 hours with ventilation for the first two hours (a nonzero damage rate), a duration comparable with murine experiments [63, 64].

Many of these sets had initial conditions associated with a severely inflamed lung without ventilation, which did not seem biologically realistic. To correct for this we eliminated sets based on their initial condition for  $E_e$  (empty/dead cells). We performed all of the analysis below with three different thresholds to see whether the exclusion of these parameter sets affected the results. In this paper we focus on the 23,086 parameters sets that had  $E_e(0) < 50\%$  and show a summary of all results for  $E_e(0) < 25\%$  and  $E_e(0) < 75\%$  in the supplementary materials. We did not find any major differences when varying this inclusion threshold.

Simulations were separated into three categories of disease progression: 1) healthy epithelial cells sufficiently cover the alveoli to function normally or existence of 2) moderate or 3) severe inflammation and associated tissue damage. These progressions are called healthy, moderate inflammation, and severe inflammation, respectively.

To quantify these three different states, we divided percentages of healthy epithelial cells into categories:

- Healthy:  $E_h \geq 90\%$
- Moderate inflammation:  $50\% \leq E_h < 90\%$
- Severe inflammation:  $0\% \leq E_h < 50\%$

In this way, each parameter set can be classified into three different categories based on their  $E_h$  values either before or after ventilation. Thus, sets are classified by their initial conditions and then again after simulation with ventilation. These parameter sets, their corresponding transients, and the outcomes they generate were used to develop a virtual cohort representing a variety of immune system dynamics. The cohort was then used to

573 compare outcomes, transient properties, underlying parameters, and their  
574 corresponding biological mechanisms.

## 575 2.6. *eFAST*

576 We used several tools to perform a sensitivity analysis of model param-  
577 eters. A common method is calculating partial rank correlation coefficients  
578 (PRCCs), but results are only reliable for monotonic relationships between  
579 parameters and variables. Our model output does not fit this criteria. Marino  
580 *et al.* suggest the extended Fourier amplitude sensitivity test (eFAST), a  
581 variance-based method for non-linear, non-monotonic relationships [61]. The  
582 greatest drawback of eFAST compared to PRCC is the computation time.

583 eFAST, developed by Saltelli *et al.* [65], Saltelli & Bolado [66], and Saltelli  
584 *et al.* [67] is the extended version of FAST, originally developed by Cukier *et*  
585 *al.* [68], Schaibly & Shuler [69], and Collins & Avissar [70]. Parameters are  
586 varied and the resulting variation in model output is calculated using statis-  
587 tical variance. The algorithm varies each parameter at different frequencies  
588 by creating a sinusoidal function, called a search curve, and then sampling  
589 parameter values along the function. Fourier analysis measures the influ-  
590 ence of the parameter’s frequency on model output. First-order sensitivity  
591  $S_i$  for a parameter  $i$  is calculated by varying only  $i$  and leaving the rest con-  
592 stant. Total-order sensitivity  $S_{Ti}$  is calculated by varying  $i$  using a unique,  
593 higher frequency and varying the other parameters using lower non-unique  
594 frequencies. This total-order sensitivity captures non-linear interactions be-  
595 tween parameters in addition to changes in model output. We implement  
596 the method by Marino *et al.* [61] to calculate  $S_i$  and  $S_{Ti}$  and determine  
597 their statistical significance of for each parameter. A “dummy parameter” is  
598 included in the parameter set and its eFAST index is compared to the other  
599 parameters found in the model.

600 MATLAB functions by Kirschner *et al.* [62] are available online to per-  
601 form eFAST. We obtain 65 values of each parameter on a search curve and  
602 repeat this process for five unique search curves since different ones can gen-  
603 erate slightly different samples. Sensitivity can be calculated at specific time  
604 points for the desired variable.

## 605 2.7. *Random forest decision tree*

606 Aside from more conventional sensitivity analysis measures, we chose a  
607 few alternative methods that require less computation time and can include  
608 other features of the model besides parameters. One of these alternatives is

a random forest decision tree. A decision tree algorithm is a classification tool that uses the given properties of an individual or object to determine into which category it should fall [71, 72]. In this case, each parameter set in the virtual cohort has a number of predictors and outputs: parameters and any other characteristics from the transients that can be quantified or given a classification value. The algorithm takes a training set, a subset of the cohort about which all predictors and outputs are known, and can train the algorithm to classify virtual cohort members into specific categories.

An output of the model that we are particularly concerned with predicting is the patient’s outcome, as described in the previous section. The decision tree generated from the training set makes predictions for the rest of the virtual cohort members about whether each one will fall into one of the three outcomes: healthy, moderate inflammation, or severe inflammation. The tree contains branches at which specific parameters are chosen to best assist in classification. The parameter values of each “individual” in the cohort determines the path along the tree until it reaches the most likely outcome based on the training set.

Since a decision tree simply takes a series of values for each predictor and is not dependent on the model itself, measures besides just parameters can be used. We included supplementary predictors calculated from the transients, described in Table 3. Adding these predictors allowed for the possibility that the best classifiers of outcome could be not only parameters but also properties of the transients. This knowledge could provide additional information about metrics for experimentalists and clinicians to keep track of and identify early warning signs for undesirable results.

For added robustness against overfitting [72], we use a random forest decision tree algorithm, in which a user-specified number of randomly chosen parameters are candidates at each branch; then the algorithm selects one to be the splitting variable from that smaller group. The `rf` function in R generates 500 decision trees as the “forest” along with several other useful output metrics. One metric in particular is the importance value of each parameter or characteristic, calculated from the Gini Index. The importance value is a measure of how important any given parameter was in determining the outcome of each parameter set in the virtual cohort. Because of the large number of parameters in the model, this can provide intuition on which parameters and other characteristics of the transients are most influential in determining outcomes. The R and MATLAB code used for this method are provided in the supplementary materials.

| Predictor                | Comment, description                                   |
|--------------------------|--------------------------------------------------------|
| Maximum $M1$ percent     |                                                        |
| Maximum $M2$ percent     |                                                        |
| Minimum $M1$ percent     |                                                        |
| Minimum $M2$ percent     |                                                        |
| Maximum $M1$             |                                                        |
| Maximum $M2$             |                                                        |
| Minimum $M1$             |                                                        |
| Minimum $M2$             |                                                        |
| $M1$ peak time           | Time at which $M1$ peak occurs                         |
| $M2$ peak time           | Time at which $M2$ peak occurs                         |
| $M2$ percent at 10 hours |                                                        |
| $M1$ peak ratio          | Ratio of $M1$ peak to $M1$ initial condition           |
| $E_h$ difference         | Difference between first and last time points of $E_h$ |
| $E_h$ ratio 0.5h         | Ratio of IC to $E_h$ at 30 minutes                     |
| $E_h$ ratio 2h           | Ratio of IC to $E_h$ at 2 hours                        |
| $E_h$ ratio 6h           | Ratio of IC to $E_h$ at 6 hours                        |
| Fits $t = 0$ $M0$ data   | 0 = does not fit, 1 = does fit                         |
| Fits all data            | 0 = does not fit, 1 = does fit                         |

Table 3: Additional predictors used in analysis of parameter space with descriptions if necessary. These predictors were used with the random forest decision tree, correlations, and significance testing.



### 3. Results

Our aim is to understand how recruitment of the immune response and its interactions with epithelial cells translate to specific outcomes and what dynamics are driving this process. Therefore, we developed an ODE model of the immune response to ventilator-induced damage, which explicitly tracks macrophage phenotype and epithelial cells. A fixed point and stability analysis of the epithelial subsystem reveals the long-term stability of a simplified version of the system under various conditions, and how changes in those conditions affect stability. Using Latin hypercube sampling, we generated parameter sets that replicate different possible responses to VILI and created a virtual cohort of patients. We also perform an analysis of the large parameter space by comparing various techniques to determine predictors of outcome and/or processes that could be targeted to modulate outcome.

#### 3.1. Sample Transients and Cohort Breakdown

This model can generate a variety of dynamics, similar to expected responses of patients on a ventilator. There is significant variability between outcomes as well as within them. Fig 4 shows examples of these different dynamics for healthy epithelial cells and M0, M1, and M2 macrophages using a case of each of the three outcomes: healthy, moderate inflammation, and severe inflammation. Simulations were run in MATLAB using the code provided in the supplementary materials.

We generated 100,000 parameter sets using LHS with parameter ranges given in Table 2. Fig 5 shows the breakdown of these parameter sets based on whether or not the dynamics lead to a steady-state system in the absence of ventilation, their classification before ventilation, and the resulting state (healthy, moderate inflammation, and severe inflammation) after 200 hours, the first 2 hours being ventilation. We also rejected any parameter sets with  $E_e(0) \geq 50\%$ , since this would not be biologically realistic. The top number in each box is the total number of parameter sets in that category, and that number is further broken down by the category in which they start (column 1) and end (column 2). For the first column, the number in parentheses is the number of sets that started in that category but ended in a different one. Conversely, the number in parentheses in the second column shows the sets that ended in a certain outcome but did not start there. These numbers serve as a summary of how damage may affect outcome for the variety of behaviors in the virtual cohort. We will analyze all 23,086 sets that reach

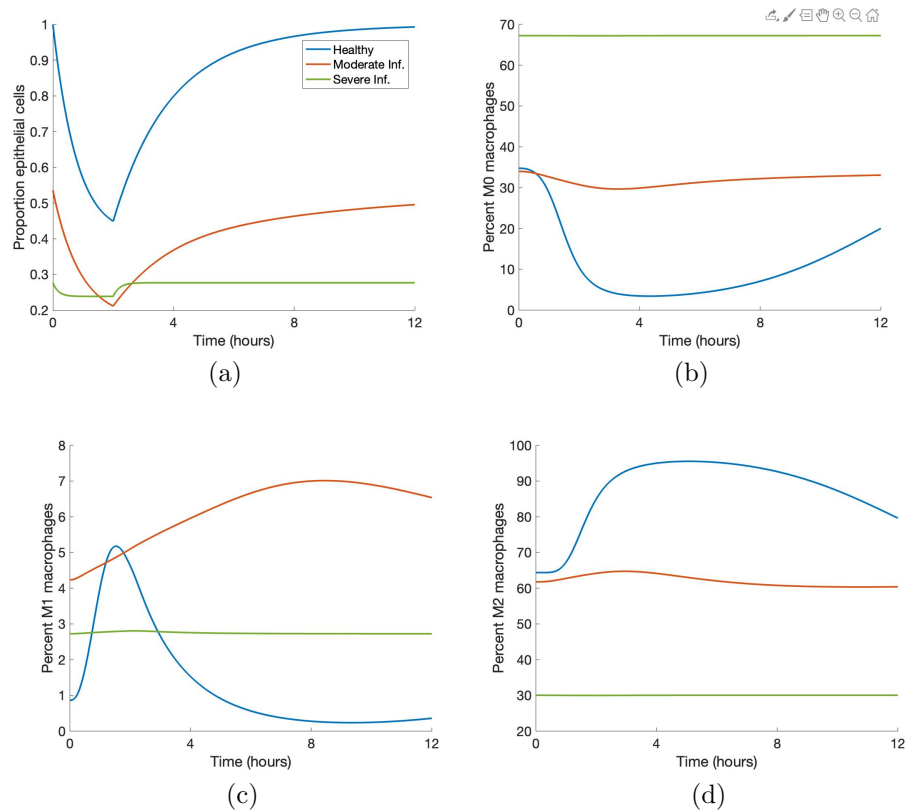

Figure 4: **Sample simulations show the variety of model-generated dynamics.** Blue, orange, and green curves indicate healthy, moderate inflammation and severe inflammation outcomes, respectively. (a) Proportion healthy epithelial cells. (b) Percent M0 macrophages. (c) Percent M1 macrophages. (d) Percent M2 macrophages.

|                          |              |             |
|--------------------------|--------------|-------------|
| Total LHS runs: 100,000  |              |             |
| Steady-state: 23,086     |              |             |
|                          | IC           | ES          |
| H:                       | 15,890 (438) | 15,453 (1)  |
| P:                       | 5,090 (101)  | 5,319 (330) |
| D:                       | 2,106 (0)    | 2,314 (208) |
| Not steady-state: 76,914 |              |             |

Figure 5: **Results of 100,000 LHS runs grouped by disease progression.** Parameter sets are broken down by their initial conditions (IC) and ending states (ES) and by category healthy (H), moderate inflammation (M), or severe inflammation (S). Numbers in parentheses in the IC columns are the number of simulations that started in the category associated with that row and change their state after ventilation. Numbers in parentheses in the ES columns are the number of simulations that ended in the category associated with that row, but were not in that category before ventilation. All parameter sets are associated with a steady-state solution with  $E_e(0) < 50\%$ .

683 steady state (with  $E_e(0) < 50\%$ ) to understand the full array of responses  
684 that could occur. In the future, experimental data could help narrow down  
685 responses.

### 686 3.2. Determining Predictors and Driving Dynamics

687 Our model has 18 variables and 67 parameters. Using a variety of math-  
688 ematical, statistical, and computational methods, we determined the param-  
689 eters and other predictors that stand out, those to which output is most  
690 sensitive and may help differentiate or predict what is driving outcome. In  
691 this section we explain and compare the results of each method.

#### 692 3.2.1. Correlations and significance testing highlight specific parameters

693 As an initial step towards understanding relationships between param-  
694 eters and model output, we calculated the correlations of parameters and  
695 predictors with outcome. There were some correlations between predictors  
696 that are very high, but are measuring similar things; for example, maximum  
697 M1 and minimum M1. We excluded these since they do not provide new  
698 or useful information. Aside from these, there are only a few correlations  
699 between parameters or between parameters and predictors that are higher  
700 than  $R = 0.3$ ; notable pairs are shown in Fig 6 using random samples from  
701 each outcome for better visibility of the points. For  $k_{mne}$ , the rate of collat-  
702 eral damage to epithelial cells by macrophages and neutrophils, parameter

sets that result in moderate and severe inflammation outcomes have a significant correlation with the  $E_h$  ratio at 0.5 hours, shown in Fig 6a. The  $E_h$  ratio and  $k_{mne}$  have the following correlations for each outcome: healthy  $R = 0.1$  (not shown), moderate inflammation  $R = 0.67$ , and severe inflammation  $R = 0.82$ . The  $b_r$  parameter, representing the baseline repair rate for epithelial cells, has the following correlations with the same  $E_h$  ratio for each type of outcome, healthy  $R = 0.29$ , moderate inflammation  $R = 0.41$ , and severe inflammation  $R = 0.37$ , shown in Fig 6b. Visual inspection of both graphs shows possible nonlinear behavior that should be investigated further. The only other pair with a correlation above 0.3 is  $s_m$ , the source rate for naive macrophages, and the maximum and minimum values of M2 macrophages over the entire simulation. The parameter  $s_m$  and maximum M2 have the following correlations: healthy  $R = 0.32$ ; moderate inflammation  $R = 0.3$ ; severe inflammation  $R = 0.3$ . Fig 6c shows these correlations;  $s_m$  and minimum M2 is not shown but have similar results.

We also performed hypothesis testing for predictors (excluding binary variables). The Kruskal-Wallis test is an alternative to ANOVA when the variable distributions are not normal [73]. Due to our choice of a uniform sampling distribution for LHS, parameter distributions for the 23,086 sets are roughly uniform. We categorized all parameter sets by their outcome (healthy, moderate inflammation, severe inflammation) and compared them. If any of the three groups had a statistically significant difference (p-value less than 0.01), a Wilcoxon test was performed on each pair (healthy and moderate inflammation, healthy and severe inflammation, moderate and severe inflammation) to determine which groups were different from one another. P-values for the Kruskal-Wallis and Wilcoxon tests were adjusted using the Benjamini–Hochberg procedure to control for the false discovery rate [74]. Knowledge of which parameters and other predictors are different between groups based on outcome provides insight into predicting outcomes and which predictors might best influence the immune response to damage.

35 out of 81 parameters and predictors returned results for a statistically significant difference between at least two groups and 14 gave statistically significant differences between all three groups. Table 4 shows a summary of the results from the various methods used to examine predictors' significance in determining model output. Column 1 of Table 4 shows the predictors in which all three groups were different from one another, as determined by the Kruskal-Wallis and Wilcoxon tests. Results in columns 2-5 are described in the following sections. Box plots of a subset of predictors in which all three

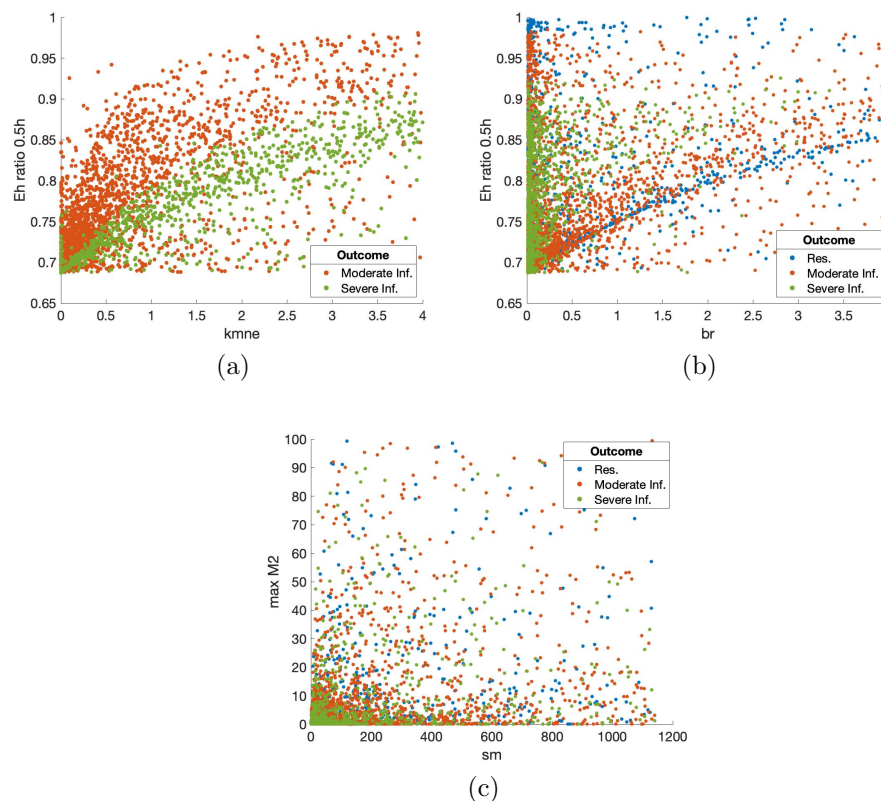

**Figure 6: Scatter plot of predictors with notable correlations.** Points are a random sample of the total points. (a) Parameter  $k_{mne}$  (rate of collateral damage to epithelial cells by macrophages and neutrophils) versus ratio of  $E_h$  at 0.5 hours to initial  $E_h$  values. Correlations: resolved to healthy  $R = 0.1$  (not shown); moderate inflammation  $R = 0.67$ ; severe inflammation  $R = 0.82$ . (b) Parameter  $b_r$  (baseline rate of epithelial repair) versus ratio of  $E_h$  at 0.5 hours to initial  $E_h$  values. Correlations for parameter sets in each outcome: resolved to healthy  $R = 0.29$ ; moderate inflammation  $R = 0.41$ ; severe inflammation  $R = 0.37$ . (c) Parameter  $s_m$  (source rate of M0 macrophages) versus maximum M2. Correlations for parameter sets in each outcome: healthy  $R = 0.32$ ; moderate inflammation  $R = 0.3$ ; severe inflammation  $R = 0.3$ .

| Sig. Testing<br>(Not ordered) | Random Forest<br>(Ordered output) | eFAST (Ordered) |           |           |
|-------------------------------|-----------------------------------|-----------------|-----------|-----------|
|                               |                                   | 0.5h            | 2h        | 6h        |
| $k_{mne}$                     | $k_{mne}$                         | $k_n$           | $k_n$     | $x_{m0a}$ |
| $x_{mne}$                     | $x_{mne}$                         | $\mu_p$         | $x_{mne}$ |           |
| $E_h$ ratio 6h                | $E_h$ ratio 6h                    | $x_{m0a}$       | $k_{en}$  |           |
|                               | $E_h$ ratio 2h                    | $x_{mne}$       | $b_r$     |           |
|                               | $E_h$ ratio 0.5h                  | $k_{en}$        | $x_{nup}$ |           |
| $b_r$                         | $b_r$                             | $b_r$           | $x_{m0a}$ |           |
| Min M1                        | Min M1                            | $\mu_{m1}$      | $s_p$     |           |
| $k_{en}$                      | $k_{en}$                          | $k_{am1}$       | $\mu_p$   |           |
| Min M1%                       | Min M1%                           |                 | $k_{pe}$  |           |
|                               | $k_{ep}$                          |                 | $\mu_R$   |           |
| M1 peak time                  |                                   |                 |           |           |
| $k_{em1}$                     |                                   |                 |           |           |
| M2 peak time                  |                                   |                 |           |           |
| $k_{an}$                      |                                   |                 |           |           |
| $k_{ep}$                      |                                   |                 |           |           |
| M1 peak ratio                 |                                   |                 |           |           |
| $x_{nup}$                     |                                   |                 |           |           |

Table 4: Summary of three different methods used to determine the most influential predictors, including parameters and other factors. Columns 1 & 2 show results for all 23,086 parameter sets. Column 1: significance testing results for predictors in which all three outcome groups are statistically different (p-value < 0.01). For ease of comparison between columns, the predictor is listed next to its counterpart in the ordered random forest list, if listed in that column. Column 2: average importance values determined by random forest decision trees. The top ten are ordered from highest to lowest importance. Columns 3-5: eFAST results (ordered by p-value, with p-value < 0.02) for three time points.

groups are different are shown in Fig 7 to help visualize these differences.

### 3.2.2. Parameter Sensitivity with eFAST

Since outcome of  $E_h$  is the metric by which we determine health of the individual, we calculated eFAST indexes for  $E_h$  at 30 minutes, two hours (end of ventilation), and six hours. We calculated first-order and total-order sensitivities  $S_i$  and  $S_{Ti}$ , respectively. Fig 8 shows results for the parameters with p-value < 0.02. Parameters  $k_n$  (rate of migration of  $N_b$  to lung),  $x_{mne}$  (Hill-type constant for effectiveness of macrophages and neutrophils in damaging epithelial cells),  $x_{m0a}$  (Hill-type constant for effectiveness of differentiation of  $M_0$  by  $a$ ),  $b_r$  (baseline repair of damaged cells), and  $k_{en}$  (phagocytosis of damaged cells by  $N$ ) are sensitive for several time points. Comparing  $S_i$  and

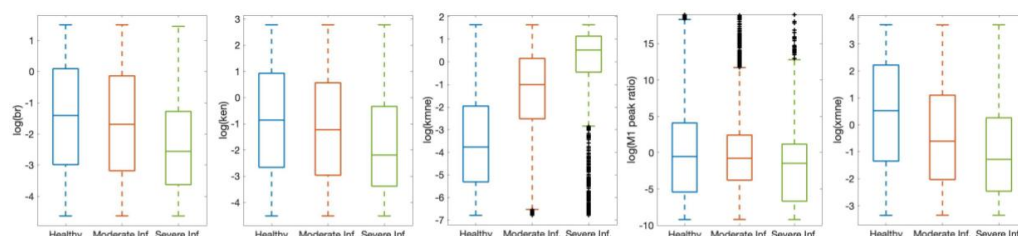

**Figure 7: Predictors selected by significance testing show visible differences between disease progression groups.** Subset of parameters and predictors that showed a statistically significant difference between all three outcomes: healthy, moderate inflammation, and severe inflammation, as determined by the Kruskal-Wallis and Wilcoxon tests. Some are shown on a log scale and some outliers removed from figure for better visibility. Black x's are outliers.

752  $S_{T_i}$  in Fig 8, it is possible that nonlinear interaction between parameters  
 753 affects model output more at 6 hours than at 2 hours. Parameters with a  
 754 significant  $S_i$  may also be better candidates for treatment than those with a  
 755 significant  $S_{T_i}$  because first-order sensitivity measures sensitivity of  $E_h$  based  
 756 only on fluctuations in a single parameter. For this reason and since many of  
 757 the same parameters are significant for first-order and total-order sensitivity,  
 758 we show results for first-order sensitivity in Columns 5-7 of Table 4, ordered  
 759 from lowest p-value to highest and for the three time points specified.

### 760 3.2.3. Random forest algorithm to determine predictors

761 The randomness of the decision tree algorithm means that each random  
 762 forest generated and its resulting importance values are slightly different.  
 763 To offset any unusual results generated by the randomness, we replicated the  
 764 process of randomly selecting a training set and generating importance values  
 765 from the random forest 1000 times. Fig 9 shows the average and standard  
 766 deviations of the top ten importance values generated.

767 Notice that the standard deviations are small enough so that although  
 768 some of the top importance values may change order in different random for-  
 769 est simulations, in general the most important predictors remained the same  
 770 across numerous simulations. Furthermore, several of the top ten predictors  
 771 were found to be significant by the Kruskal-Wallis Test, and  $b_r$  and  $k_{mne}$   
 772 are shared by random forest and eFAST. (see Table 4). The consistency of  
 773 the importance of these parameters and predictors using different methods  
 774 supports the idea that they play a significant role in the sensitivity of model



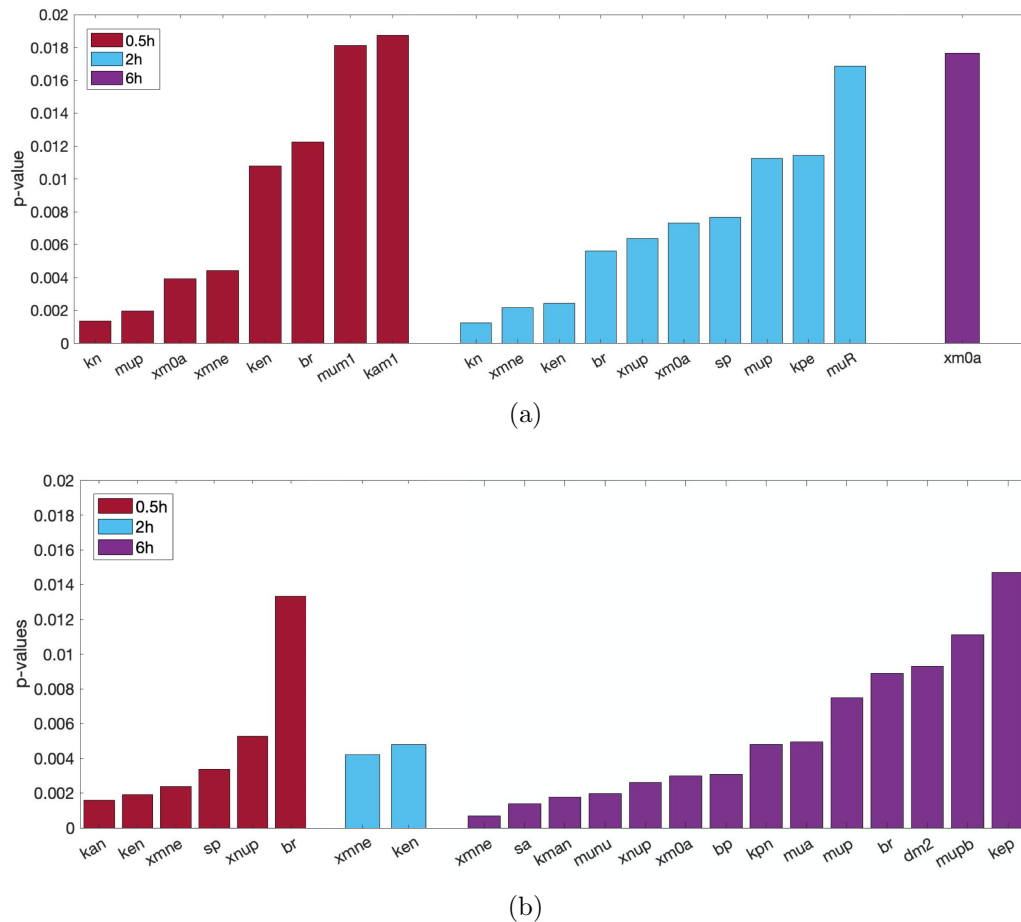

Figure 8: **Parameter sensitivity analysis shows which parameters most influence model output.** Parameters determined by eFAST to be most sensitive, with p-values calculated by comparing eFAST sensitivity indexes to a dummy variable. Results are given for each of the time points tested: 0.5 (red), 2 (blue), and 6 hours (purple). (a) First-order sensitivity, also shown in Table 4. (b) Total-order sensitivity.

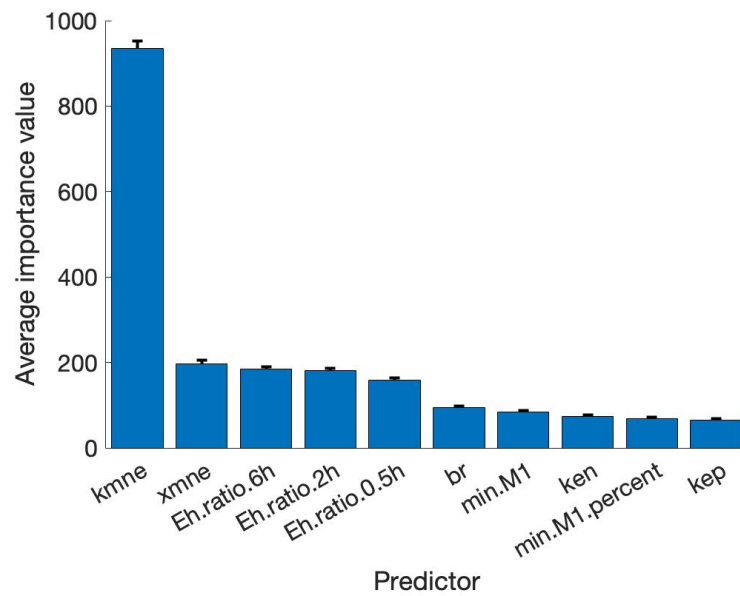

Figure 9: **Random forest decision tree selects top indicators of outcome.** Mean and standard deviation of importance values for the top ten highest predictors from 1000 random forest decision trees.

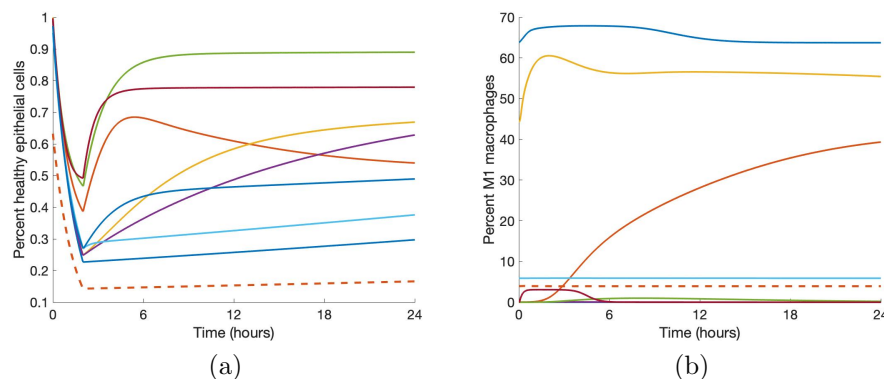

Figure 10: **Some parameter sets generate transients that end in a worse disease progression after ventilation.** (a) Transients of  $E_h$  that start at one state and end at a lower one. (b) Corresponding transients of  $M1$ . Solid lines represent transients that start healthy and end in moderate inflammation; the dotted line represents the transient that starts in moderate inflammation and ends in severe inflammation.

775 output and determining or differentiating outcomes.

### 776 3.3. Modulating recovery: a case study of select transients

777 Fig 10 shows nine examples of transients that started in one disease pro-  
 778 gression category and ended in another. We used the information gained in  
 779 the parameter analysis to identify key targets for treatment that could mod-  
 780 ulate damage, especially in the case of a patient starting in one state and  
 781 ending in a different, negative outcome after ventilation. The goal is to re-  
 782 turn the cohort member to its original steady-state earlier, since the inability  
 783 to recover from a 2-hour vent after 200 hours or more could be detrimental  
 784 to long-term health.

785 Our analysis shows that the parameters  $b_r$ , the rate of self-repair of  
 786 healthy epithelial cells,  $k_{mne}$ , the rate of collateral damage by macrophages  
 787 and neutrophils to epithelial cells,  $x_{mne}$ , the Hill-type constant which regu-  
 788 lates the effectiveness of macrophages and neutrophils in damaging epithelial  
 789 cells, and  $k_{en}$ , the rate of phagocytosis of damaged cells by neutrophils, are  
 790 some of the most influential parameters and thus could inform targets for  
 791 treatment. It is also important to note that different interventions could  
 792 begin and end at any time during or after ventilation, so we examined inter-  
 793 ventions at several time points (see Fig 11).

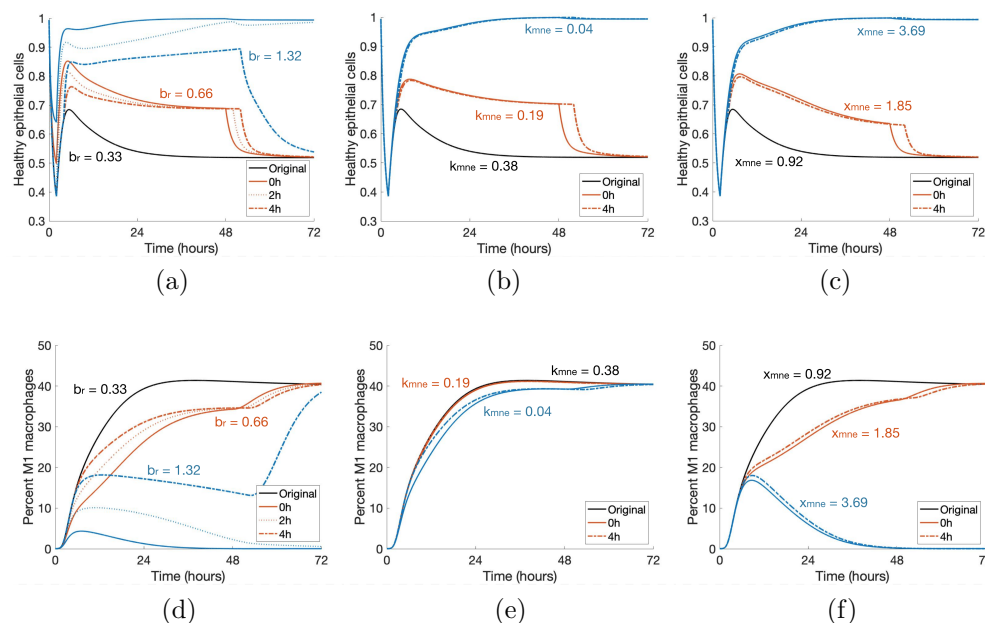

**Figure 11: Modulating parameters based on parameter analysis improves outcome in case study.** Starting with a parameter set that gives rise to an  $E_h$  transient that starts healthy and ends in a moderate inflammation state, we applied various treatment strategies by changing three key parameters,  $b_r$  (rate at which healthy epithelial cells self-repair),  $k_{mne}$  (rate of collateral damage to epithelial cells by macrophages and neutrophils), and  $x_{mne}$  (Hill-type constant which regulates the effectiveness of macrophages and neutrophils in damaging epithelial cells). Results for various changes are shown for healthy epithelial cells (a, b, c) and percent of M1 macrophages (d, e, f). Treatment was started at 0, 2, or 4 hours after the start of ventilation, denoted by solid, dotted, and dot-dashed lines, respectively, and lasted for 48 hours. The original parameter values are  $b_r = 0.33$ ,  $k_{mne} = 0.38$ , and  $x_{mne} = 0.92$ . Black transients show the original dynamics without intervention. Orange transients represent values of each parameter that are insufficient to mediate prolonged macrophage activation. Blue transients show values that are sufficient to bring about resolution, depending on intervention time.

We intervened in a case that starts healthy and ends in moderate inflammation. Note in Fig 11, the original  $E_h$  transient begins recovery to healthy after the two-hour ventilation period, but by the end of the 200-hour period, is at a lower  $E_h$  value. This is coupled with a transient for M1 in which the pro-inflammatory phenotype increases to 40-45% and stays in this range.

Increasing  $b_r$  by various amounts has increasingly positive effects on long-term epithelial health. Lower values of  $b_r$  increase  $E_h$  slightly and an earlier intervention can generate a higher peak of  $E_h$  around five hours, but does not continue increasing at this rate regardless of intervention time. If  $b_r$  is increased substantially for a significant duration of treatment time, healthy epithelial cells reach the healthy steady-state after ventilation and do not decrease again. Shown in Figures 11a and 11d, doubling  $b_r$  to 0.66 is not enough to generate recovery, but increasing  $b_r$  by a factor of four to 1.32 does result in a healthy outcome. For an insufficient treatment duration and value of  $b_r$ , levels of  $E_h$  will be higher until treatment ends and then decrease back to the same level as the original simulation. For a long enough treatment duration, the proportion of healthy epithelial cells will remain high even after treatment ends. For  $b_r = 0.66$ , the intervention time does not improve health in the long run, whereas for  $b_r = 1.32$ , intervention at either 0 or 2 hours is sufficient to bring about recovery while intervention at 4 hours is not.

The parameter  $k_{mne}$  has an inverse relationship with epithelial health; thus, decreasing the parameter provides better results. Decreasing  $k_{mne}$  slightly can increase the rate of recovery slightly but not enough to change the outcome to resolved. However, with a significant enough decrease of  $k_{mne}$ , M1 activation peaks around hour 10 and decreases back to its original levels. The original simulation shows M1 activation leveling off at a high percentage of activation (Fig 11e). The modulated return to baseline levels is paired with a healthy outcome for epithelial cells (Fig 11b). For higher values of  $k_{mne}$ , results are about the same for any intervention time 4 hours or less after the beginning of ventilation. Note in Fig 11 that the time at which intervention begins matters somewhat for changes in  $b_r$  but not for  $k_{mne}$ . Figures 11b and 11e show that half of the original value of  $k_{mne}$  (0.38 to 0.19) is not low enough to change the outcome; multiplying by a factor of 0.1 to  $k_{mne} = 0.04$ , on the other hand, is sufficient to change the outcome to healthy.

We also increase the parameter  $x_{mne}$ . Increasing this value causes the presence of macrophages and neutrophils to be less effective in damaging epithelial cells. Similarly to the other treatments, sufficient changes to  $x_{mne}$

bring about long-term recovery and the time at which intervention begins is not as important. Figures 11c and 11f show doubling  $x_{mne}$  to 1.85 is insufficient to change the outcome, and increasing  $x_{mne}$  by a factor of four to 3.69 is sufficient.

Finally, we increase  $k_{en}$ . This increases the rate at which neutrophils phagocytize damaged cells, making room for new, healthy cells. Interestingly, although  $k_{en}$  is shown to be an important parameter in our analysis, even increasing the parameter by a factor of ten to 1.52 is insufficient to make any real changes in the epithelial and macrophage populations. Since there was no significant change, we do not show this treatment in Fig 11.

We also examine the results of combination therapy that could include regulation of two or three parameters. Together, changes in parameter values that would be insufficient on their own are able to regulate macrophage activation and bring epithelial cells back to a healthy state. Additionally, higher values of  $b_r$  and  $x_{mne}$  and lower values of  $k_{mne}$  precipitate a quicker recovery from damage. Intervention time is important for parameter values near the threshold, but not for parameter values sufficiently above or below the threshold. Intervention time may make a difference in the ending steady-state values of  $E_h$  or  $M1$ , depending on the parameters. Many combinations could be formulated; Fig 12 shows two cases in which two parameter changes were insufficient to bring about recovery individually but are sufficient when combined. The orange curves show  $b_r = 0.99$  and  $k_{mne} = 0.19$  and the blue curves show  $x_{mne} = 2.31$  and  $k_{en} = 1.52$ , which bring about long-term recovery for all three intervention times.

For other cases starting in a healthy state and ending in moderate inflammation or severe inflammation, a high enough  $b_r$  can bring about resolution in some cases. In general, earlier intervention times result in a faster rate of recovery, but there are varied responses to changes in  $k_{mne}$ ,  $x_{mne}$ , and  $k_{en}$ . Even for transients with similar  $E_h$  and  $M1$  dynamics, reactions to treatments may be different, reinforcing the uniqueness of each individual member of the virtual cohort.

## 4. Discussion

The spectrum of macrophage activation has been a recently growing field of research [10, 14, 15], and with the increase in the need for mechanical ventilation due to COVID-19, a better understanding of and treatment for VILI is of great concern. Mathematical models have studied a host of causes

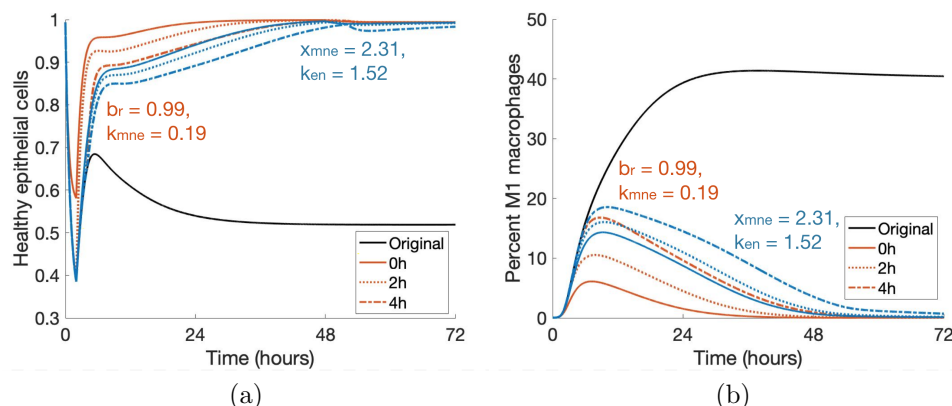

Figure 12: **Treatment by combining parameter changes can result in a positive outcome.** Changes in  $b_r$ ,  $k_{mne}$ ,  $x_{mne}$  and  $k_{en}$  that are insufficient on their own (Fig 11) result in a change in outcome when combined. Orange curves show a combination treatment of  $b_r = 0.99$  and  $k_{mne} = 0.19$  and blue curves show that of  $x_{mne} = 2.31$  and  $k_{en} = 1.52$ . Duration of treatment in each case is 48 hours, and all intervention times are successful in a long-term recovery.

of lung inflammation, including bacterial and viral infections and allergic reactions. Our model combines the varied effects of macrophage activation with a more detailed epithelial subsystem to model ventilator-induced lung injury. These features help to provide a better understanding of how the components of immune response, including those associated with the different macrophage phenotypes, play a role in whether or not there is resolution after ventilator-induced damage.

We account for recruitment of circulating immune cells from the bloodstream and their contribution to the immune response using a two-compartmental model. Our model incorporates a number of factors involved in the immune response, including naive M0, pro-inflammatory M1 and anti-inflammatory M2 macrophages, three states of epithelial cells (healthy, damaged, dead), activated and unactivated neutrophils, and various mediators used to signal between cells. The model consists of 18 state equations and 67 parameters. Because of its large size and the paucity of experimental data, we used Latin hypercube sampling to find biologically meaningful parameter sets, producing a total of 23,086 acceptable parameter sets. This “virtual cohort” produces a variety of dynamics that can be generated by the model. We classified parameter sets into categories of healthy, moderate inflamma-

tion, and severe inflammation based on the percentage of healthy epithelial cells at the beginning or end of the simulation. The resulting cohort simulations are used to determine the unique characteristics and properties of the transients that are linked to outcome and to determine candidate treatments.

We utilized several methods to determine the most important parameters for model output, particularly epithelial health. Using eFAST, a sensitivity analysis method for non-linear, non-monotonic ODEs, we found parameters that, when fluctuated, caused a statistically significant difference in output than that generated by a dummy parameter. We then compared these results with more non-conventional and less computationally intensive methods. The random forest decision tree algorithm generated values denoting the importance of parameters and other predictors on epithelial health and is particularly useful for large data sets, such as the parameter sets in our virtual cohort. Additionally, significance testing determined statistically significant differences in parameters grouped by outcome.

We were able to not only include parameter values in this analysis but also other predictors later found to be important, including the M1 peak ratio and the difference between  $E_h$  initial condition and ending value. Three of the most important parameters were  $b_r$ , the rate of self-repair of epithelial cells,  $k_{mne}$ , the rate at which macrophages and neutrophils cause collateral damage to epithelial cells,  $x_{mne}$ , the Hill-type coefficient that regulates the effectiveness of that collateral damage, and  $k_{en}$ , the rate of phagocytosis of damaged epithelial cells by neutrophils. These important parameters and predictors were confirmed by at least two of the methods used.

Analysis showed that properties and parameters related to epithelial repair and M1 activation and de-activation were especially predictive of outcome. We used  $b_r$ ,  $k_{mne}$ ,  $x_{mne}$ , and  $k_{en}$  to simulate treatments for a parameter set in the virtual cohort that started healthy and ended in a moderate inflammation disease progression. We found that modulating  $b_r$  is effective in most cases, and the other four can be helpful in some. The chosen case responded differently to treatments and these were paired with varied M1 activation dynamics, indicating that macrophage activation is tied to epithelial health in VILI.

Our approach of developing a virtual cohort and selecting important parameters is a first step in identifying the driving mechanisms behind VILI and how they contribute to outcomes. However, experimental data will be necessary to better understand the immune response to VILI and identify biologically realistic dynamics. Concentrations of macrophages and neutrophils,



as well as a way to experimentally measure epithelial health at multiple time points would be extremely beneficial. Preliminary data is currently being collected, which can be explored in future work.

Another area of further study is determining why some virtual cases can recover with a short intervention time while others need indefinite treatment. We hypothesize that this has to do with patient-specific initial conditions and parameters but more work should be done to obtain a definite answer. This would help determine the risk of VILI for patients who undergo ventilation, since patients generally need ventilation because of a preexisting condition and do not begin ventilation in a completely healthy state. In fact, this model could be extended to include other types of injury such as a bacterial or viral infection to study the interactions between the different types of injury and how they contribute to patient outcome.

In conclusion, our model contributes to the current understanding of the immune response in the lungs, and is an important first step for VILI. Our parameter analysis using a variety of methods provides new insight into potential interventions during and after ventilation to mediate VILI. Experimental data will greatly improve our ability to suggest treatments. Furthermore, the model can be extended to include other types of injury that create the need for mechanical ventilation in the first place.

## 5. Acknowledgments

This work was supported by the National Science Foundation via award CMMI-1351162 and by the National Institutes of Health via award R21HL146250 (R.H.).

## References

- [1] E. Mahase, Covid-19: most patients require mechanical ventilation in first 24 hours of critical care, *BMJ* 368 (2020). URL: <https://www.bmj.com/content/368/bmj.m1201>. doi:10.1136/bmj.m1201, publisher: British Medical Journal Publishing Group Section: News.
- [2] F. J. J. Halbertsma, M. Vaneker, G. J. Scheffer, J. G. van der Hoeven, Cytokines and biotrauma in ventilator-induced lung injury: a critical review of the literature, *The Netherlands Journal of Medicine* 63 (2005) 382–392.

- 959 [3] A. S. Slutsky, V. M. Ranieri, Ventilator-Induced Lung In-  
960 jury, New England Journal of Medicine 369 (2013) 2126–  
961 2136. URL: <http://dx.doi.org/10.1056/NEJMra1208707>.  
962 doi:10.1056/NEJMra1208707.
- 963 [4] M. Provinciali, M. Cardelli, F. Marchegiani, Inflammation, chronic ob-  
964 structive pulmonary disease and aging, Current Opinion in Pulmonary  
965 Medicine 17 (2011) S3. doi:10.1097/01.mcp.0000410742.90463.1f.
- 966 [5] N. d. Rekeneire, R. Peila, J. Ding, L. H. Colbert, M. Visser,  
967 R. I. Shorr, S. B. Kritchevsky, L. H. Kuller, E. S. Strotmeyer,  
968 A. V. Schwartz, B. Vellas, T. B. Harris, Diabetes, Hyperglycemia,  
969 and Inflammation in Older Individuals: The Health, Aging and  
970 Body Composition study, Diabetes Care 29 (2006) 1902–1908.  
971 URL: <https://care.diabetesjournals.org/content/29/8/1902>.  
972 doi:10.2337/dc05-2327.
- 973 [6] C. H. Canan, N. S. Gokhale, B. Carruthers, W. P. Lafuse, L. S.  
974 Schlesinger, J. B. Torrelles, J. Turner, Characterization of Lung  
975 Inflammation and its Impact on Macrophage Function in Ag-  
976 ing, Journal of Leukocyte Biology 96 (2014) 473–480. URL:  
977 <http://www.jleukbio.org.proxy.library.vcu.edu/content/96/3/473>.  
978 doi:10.1189/jlb.4A0214-093RR.
- 979 [7] Y. Feng, Y. Amoateng-Adjepong, D. Kaufman, C. Gheorghe, C. A.  
980 Manthous, Age, duration of mechanical ventilation, and outcomes of  
981 patients who are critically ill, Chest 136 (2009) 759–764.
- 982 [8] Z. Wu, J. M. McGoogan, Characteristics of and Important Lessons  
983 From the Coronavirus Disease 2019 (COVID-19) Outbreak in China:  
984 Summary of a Report of 72 314 Cases From the Chinese Center for  
985 Disease Control and Prevention, JAMA 323 (2020) 1239–1242. URL:  
986 <https://jamanetwork.com/journals/jama/fullarticle/2762130>.  
987 doi:10.1001/jama.2020.2648, publisher: American Medical Association.
- 988 [9] G. Bruno, S. Perelli, C. Fabrizio, G. B. Buccoliero, Short-term  
989 outcomes in individuals aged 75 or older with severe coronavirus  
990 disease (COVID-19): First observations from an Infectious Dis-  
991 eases Unit in Southern Italy, The Journal of Infection (2020).

- 992 URL: <https://www.ncbi.nlm.nih.gov/pmc/articles/PMC7224683/>.  
993 doi:10.1016/j.jinf.2020.05.024.
- 994 [10] M. Torres, J. Wang, P. J. Yannie, S. Ghosh, R. A. Segal, A. M.  
995 Reynolds, Identifying important parameters in the inflammatory pro-  
996 cess with a mathematical model of immune cell influx and macrophage  
997 polarization, *PLOS Computational Biology* 15 (2019) e1007172. URL:  
998 <https://journals.plos.org/ploscompbiol/article?id=10.1371/journal.pcbi.1007172>.  
999 doi:10.1371/journal.pcbi.1007172.
- 1000 [11] M. A. Matthay, L. Robriquet, X. Fang, Alveolar Epithelium, *Pro-*  
1001 *ceedings of the American Thoracic Society* 2 (2005) 206–213. URL:  
1002 <https://www.atsjournals.org/doi/full/10.1513/pats.200501-009AC>.  
1003 doi:10.1513/pats.200501-009AC.
- 1004 [12] R. J. Mason, Biology of alveolar type II  
1005 cells, *Respirology* 11 (2006) S12–S15. URL:  
1006 <https://onlinelibrary.wiley.com/doi/abs/10.1111/j.1440-1843.2006.00800.x>.  
1007 doi:10.1111/j.1440-1843.2006.00800.x.
- 1008 [13] L. B. Ware, M. A. Matthay, The Acute Respiratory Dis-  
1009 tress Syndrome, *New England Journal of Medicine* 342 (2000)  
1010 1334–1349. URL: <https://doi.org/10.1056/NEJM200005043421806>.  
1011 doi:10.1056/NEJM200005043421806.
- 1012 [14] N. R. Aggarwal, L. S. King, F. R. D’Alessio, Diverse  
1013 Macrophage Populations Mediate Acute Lung Inflammation  
1014 and Resolution, *American Journal of Physiology-Lung Cel-*  
1015 *lular and Molecular Physiology* 306 (2014) L709–L725. URL:  
1016 <http://www.physiology.org/doi/abs/10.1152/ajplung.00341.2013>.  
1017 doi:10.1152/ajplung.00341.2013.
- 1018 [15] D. M. Mosser, J. P. Edwards, Exploring the  
1019 Full Spectrum of Macrophage Activation, *Nature*  
1020 *Reviews Immunology* 8 (2008) 958–969. URL:  
1021 <http://www.nature.com.proxy.library.vcu.edu/nri/journal/v8/n12/full/nri2448.htm>.  
1022 doi:10.1038/nri2448.
- 1023 [16] N. Wang, H. Liang, K. Zen, Molecular Mecha-  
1024 nisms That Influence the Macrophage M1–M2 Polariza-  
1025 tion Balance, *Frontiers in Immunology* 5 (2014). URL:

- 1026 <http://www.ncbi.nlm.nih.gov/pmc/articles/PMC4246889/>.  
1027 [doi:10.3389/fimmu.2014.00614](https://doi.org/10.3389/fimmu.2014.00614).
- 1028 [17] E. Kolaczowska, P. Kubes, Neutrophil Recruitment and Func-  
1029 tion in Health and Inflammation, *Nature Reviews Immunology* 13  
1030 (2013) 159–175. URL: <https://www.nature.com/articles/nri3399>.  
1031 [doi:10.1038/nri3399](https://doi.org/10.1038/nri3399).
- 1032 [18] J. Grommes, O. Soehnlein, Contribution of Neutrophils to  
1033 Acute Lung Injury, *Molecular Medicine* 17 (2011) 293–307.  
1034 URL: <https://www.ncbi.nlm.nih.gov/pmc/articles/PMC3060975/>.  
1035 [doi:10.2119/molmed.2010.00138](https://doi.org/10.2119/molmed.2010.00138).
- 1036 [19] E. J. Naylor, D. Bakstad, M. Biffen, B. Thong, P. Calverley,  
1037 S. Scott, C. A. Hart, R. J. Moots, S. W. Edwards, Haemophilus  
1038 Influenzae Induces Neutrophil Necrosis, *American Journal of Res-*  
1039 *piratory Cell and Molecular Biology* 37 (2007) 135–143. URL:  
1040 <https://www.atsjournals.org/doi/full/10.1165/rcmb.2006-0375OC>.  
1041 [doi:10.1165/rcmb.2006-0375OC](https://doi.org/10.1165/rcmb.2006-0375OC).
- 1042 [20] E. Linehan, D. Fitzgerald, Ageing and the Immune  
1043 System: Focus on Macrophages, *European Journal*  
1044 *of Microbiology and Immunology* 5 (2015) 14–24. URL:  
1045 <http://akademaii.com/doi/abs/10.1556/EuJMI-D-14-00035>.  
1046 [doi:10.1556/EuJMI-D-14-00035](https://doi.org/10.1556/EuJMI-D-14-00035).
- 1047 [21] S. Mahbub, C. R. Deburghraeve, E. J. Kovacs, Ad-  
1048 vanced Age Impairs Macrophage Polarization, *Journal of*  
1049 *Interferon & Cytokine Research* 32 (2011) 18–26. URL:  
1050 <http://online.liebertpub.com/doi/abs/10.1089/jir.2011.0058>.  
1051 [doi:10.1089/jir.2011.0058](https://doi.org/10.1089/jir.2011.0058).
- 1052 [22] S. Schirm, P. Ahnert, S. Wienhold, H. Mueller-Redetzky, G. Nouailles-  
1053 Kursar, M. Loeffler, M. Witzenrath, M. Scholz, A Biomath-  
1054 ematical Model of Pneumococcal Lung Infection and Antibio-  
1055 tic Treatment in Mice, *PLOS ONE* 11 (2016) e0156047. URL:  
1056 <http://journals.plos.org/plosone/article?id=10.1371/journal.pone.0156047>.  
1057 [doi:10.1371/journal.pone.0156047](https://doi.org/10.1371/journal.pone.0156047).

- 1058 [23] E. Mochan, D. Swigon, G. B. Ermentrout, S. Lukens,  
1059 G. Clermont, A Mathematical Model of Intrahost Pneu-  
1060 mococcal Pneumonia Infection Dynamics in Murine Strains,  
1061 Journal of Theoretical Biology 353 (2014) 44–54. URL:  
1062 <http://www.sciencedirect.com/science/article/pii/S0022519314000964>.  
1063 doi:10.1016/j.jtbi.2014.02.021.
- 1064 [24] A. M. Smith, J. A. McCullers, F. R. Adler, Mathematical Model  
1065 of a Three-Stage Innate Immune Response to a Pneumococcal Lung  
1066 Infection, Journal of Theoretical Biology 276 (2011) 106–116. URL:  
1067 <http://www.sciencedirect.com/science/article/pii/S0022519311000786>.  
1068 doi:10.1016/j.jtbi.2011.01.052.
- 1069 [25] J. Day, A. Friedman, L. S. Schlesinger, Modeling the Immune Rheostat  
1070 of Macrophages in the Lung in Response to Infection, Proceedings  
1071 of the National Academy of Sciences 106 (2009) 11246–11251. URL:  
1072 <http://www.pnas.org.proxy.library.vcu.edu/content/106/27/11246>.  
1073 doi:10.1073/pnas.0904846106.
- 1074 [26] K. Raman, A. G. Bhat, N. Chandra, A Systems Perspective  
1075 of Host–Pathogen Interactions: Predicting Disease Outcome in  
1076 Tuberculosis, Molecular BioSystems 6 (2010) 516–530. URL:  
1077 <http://pubs.rsc.org/en/content/articlelanding/2010/mb/b912129c>.  
1078 doi:10.1039/B912129C.
- 1079 [27] J. L. Segovia-Juarez, S. Ganguli, D. Kirschner, Identi-  
1080 fying Control Mechanisms of Granuloma Formation Dur-  
1081 ing M. tuberculosis Infection Using an Agent-Based Model,  
1082 Journal of Theoretical Biology 231 (2004) 357–376. URL:  
1083 <http://www.sciencedirect.com/science/article/pii/S0022519304003212>.  
1084 doi:10.1016/j.jtbi.2004.06.031.
- 1085 [28] H. Manchanda, N. Seidel, A. Krumbholz, A. Sauerbrei, M. Schmidtke,  
1086 R. Guthke, Within-Host Influenza Dynamics: A Small-Scale Math-  
1087 ematical Modeling Approach, Biosystems 118 (2014) 51–59. URL:  
1088 <http://www.sciencedirect.com/science/article/pii/S0303264714000331>.  
1089 doi:10.1016/j.biosystems.2014.02.004.
- 1090 [29] C. S. Anderson, M. L. DeDiego, D. J. Topham, J. Thakar, Boolean Mod-  
1091 eling of Cellular and Molecular Pathways Involved in Influenza Infection,

- 1092 Computational and Mathematical Methods in Medicine 2016 (2016).  
 1093 URL: <https://www.ncbi.nlm.nih.gov/pmc/articles/PMC4769743/>.  
 1094 doi:10.1155/2016/7686081.
- 1095 [30] B. Hancioglu, D. Swigon, G. Clermont, A Dynamical Model  
 1096 of Human Immune Response to Influenza A Virus Infec-  
 1097 tion, Journal of Theoretical Biology 246 (2007) 70–86. URL:  
 1098 <http://www.sciencedirect.com/science/article/pii/S0022519306005820>.  
 1099 doi:10.1016/j.jtbi.2006.12.015.
- 1100 [31] B. N. Brown, I. M. Price, F. R. Toapanta, D. R. DeAlmeida, C. A.  
 1101 Wiley, T. M. Ross, T. D. Oury, Y. Vodovotz, An Agent-Based  
 1102 Model of Inflammation and Fibrosis Following Particulate Exposure  
 1103 in the Lung, Mathematical Biosciences 231 (2011) 186–196. URL:  
 1104 <http://www.sciencedirect.com/science/article/pii/S0025556411000356>.  
 1105 doi:10.1016/j.mbs.2011.03.005.
- 1106 [32] I. L. Chernyavsky, H. Croisier, L. A. C. Chapman, L. S. Kimp-  
 1107 ton, J. E. Hiorns, B. S. Brook, O. E. Jensen, C. K. Billington,  
 1108 I. P. Hall, S. R. Johnson, The Role of Inflammation Resolution  
 1109 Speed in Airway Smooth Muscle Mass Accumulation in Asthma:  
 1110 Insight from a Theoretical Model, PLOS ONE 9 (2014) e90162. URL:  
 1111 <http://journals.plos.org/plosone/article?id=10.1371/journal.pone.0090162>.  
 1112 doi:10.1371/journal.pone.0090162.
- 1113 [33] A. Golov, S. Simakov, Y. N. Soe, R. Pryamonosov, O. Mynbaev,  
 1114 A. Kholodov, Multiscale CT-Based Computational Modeling of Alveolar  
 1115 Gas Exchange during Artificial Lung Ventilation, Cluster (Biot) and Pe-  
 1116 riodic (Cheyne-Stokes) Breathings and Bronchial Asthma Attack, Com-  
 1117 putation 5 (2017) 11. URL: <http://www.mdpi.com/2079-3197/5/1/11>.  
 1118 doi:10.3390/computation5010011.
- 1119 [34] J. J. Pothén, M. E. Poynter, J. H. T. Bates, A Computa-  
 1120 tional Model of Unresolved Allergic Inflammation in Chronic  
 1121 Asthma, American Journal of Physiology - Lung Cellu-  
 1122 lar and Molecular Physiology 308 (2015) L384–L390. URL:  
 1123 <http://ajplung.physiology.org.proxy.library.vcu.edu/content/308/4/L384>.  
 1124 doi:10.1152/ajplung.00268.2014.

- 1125 [35] P. Aghasafari, I. Bin M. Ibrahim, R. Pidaparti, Strain-induced  
1126 inflammation in pulmonary alveolar tissue due to mechanical ven-  
1127 tilation, *Biomechanics and Modeling in Mechanobiology* 16 (2017)  
1128 1103–1118. URL: <https://doi.org/10.1007/s10237-017-0879-5>.  
1129 doi:10.1007/s10237-017-0879-5.
- 1130 [36] J. H. T. Bates, C. G. Irvin, Time dependence of recruit-  
1131 ment and derecruitment in the lung: a theoretical model,  
1132 *Journal of Applied Physiology* 93 (2002) 705–713. URL:  
1133 <https://journals.physiology.org/doi/full/10.1152/japplphysiol.01274.2001>.  
1134 doi:10.1152/japplphysiol.01274.2001, publisher: American Physiological  
1135 Society.
- 1136 [37] K. L. Hamlington, B. J. Smith, G. B. Allen, J. H. T. Bates,  
1137 Predicting ventilator-induced lung injury using a lung injury cost  
1138 function, *Journal of Applied Physiology* 121 (2016) 106–114. URL:  
1139 <https://journals.physiology.org/doi/full/10.1152/japplphysiol.00096.2016>.  
1140 doi:10.1152/japplphysiol.00096.2016, publisher: American Physiological  
1141 Society.
- 1142 [38] K. G. Hickling, The Pressure–Volume Curve Is Greatly  
1143 Modified by Recruitment, *American Journal of Respira-  
1144 tory and Critical Care Medicine* 158 (1998) 194–202. URL:  
1145 <http://www.atsjournals.org.proxy.library.vcu.edu/doi/full/10.1164/ajrccm.158.1>  
1146 doi:10.1164/ajrccm.158.1.9708049.
- 1147 [39] J. Kim, R. L. Heise, A. M. Reynolds, R. M. Pida-  
1148 parti, Quantification of Age-Related Lung Tissue Me-  
1149 chanics under Mechanical Ventilation, *Medical Sciences* 5  
1150 (2017) 21. URL: <https://www.mdpi.com/2076-3271/5/4/21>.  
1151 doi:10.3390/medsci5040021, number: 4 Publisher: Multidisciplinary  
1152 Digital Publishing Institute.
- 1153 [40] J. J. Marini, P. S. Crooke, J. D. Truwit, Determinants and Limits  
1154 of Pressure-Preset Ventilation: a Mathematical Model of Pressure  
1155 Control, *Journal of Applied Physiology* 67 (1989) 1081–1092. URL:  
1156 <http://jap.physiology.org.proxy.library.vcu.edu/content/67/3/1081>.
- 1157 [41] C. B. Massa, G. B. Allen, J. H. T. Bates, Modeling the dy-  
1158 namics of recruitment and derecruitment in mice with acute lung



- injury, *Journal of Applied Physiology* 105 (2008) 1813–1821. URL: <https://journals.physiology.org/doi/full/10.1152/japplphysiol.90806.2008>. doi:10.1152/japplphysiol.90806.2008, publisher: American Physiological Society.
- [42] R. M. Pidaparti, M. Burnette, R. L. Heise, A. Reynolds, Analysis for Stress Environment in the Alveolar Sac Model, *Journal of biomedical science and engineering* 6 (2013) 901–907. URL: <http://www.ncbi.nlm.nih.gov/pmc/articles/PMC4057278/>. doi:10.4236/jbise.2013.69110.
- [43] A. Reynolds, G. Bard Ermentrout, G. Clermont, A Mathematical Model of Pulmonary Gas Exchange Under Inflammatory Stress, *Journal of Theoretical Biology* 264 (2010) 161–173. URL: <http://www.sciencedirect.com/science/article/pii/S0022519310000159>. doi:10.1016/j.jtbi.2010.01.011.
- [44] D. A. Braun, M. Fribourg, S. C. Sealfon, Cytokine Response Is Determined by Duration of Receptor and Signal Transducers and Activators of Transcription 3 (STAT3) Activation, *Journal of Biological Chemistry* 288 (2013) 2986–2993. URL: <http://www.jbc.org/content/288/5/2986>. doi:10.1074/jbc.M112.386573.
- [45] S. Maiti, W. Dai, R. C. Alaniz, J. Hahn, A. Jayaraman, Mathematical Modeling of Pro- and Anti-Inflammatory Signaling in Macrophages, *Processes* 3 (2014) 1–18. URL: <http://www.mdpi.com/2227-9717/3/1/1>. doi:10.3390/pr3010001.
- [46] L. M. Crosby, C. M. Waters, Epithelial Repair Mechanisms in the Lung, *American Journal of Physiology-Lung Cellular and Molecular Physiology* 298 (2010) L715–L731. URL: <http://www.physiology.org/doi/abs/10.1152/ajplung.00361.2009>. doi:10.1152/ajplung.00361.2009.
- [47] A. Gardner, L. A. Borthwick, A. J. Fisher, Lung Epithelial Wound Healing in Health and Disease, *Expert Review of Respiratory Medicine* 4 (2010) 647–660. URL: <https://doi.org/10.1586/ers.10.62>. doi:10.1586/ers.10.62.



- 1192 [48] S. Herold, K. Mayer, J. Lohmeyer, Acute Lung Injury:  
1193 How Macrophages Orchestrate Resolution of Inflammation  
1194 and Tissue Repair, *Frontiers in Immunology* 2 (2011). URL:  
1195 <https://www.ncbi.nlm.nih.gov/pmc/articles/PMC3342347/>.  
1196 doi:10.3389/fimmu.2011.00065.
- 1197 [49] B. Ermentrout, Simulating, Analyzing, and Animating Dy-  
1198 namical Systems, Software, Environments and Tools, Soci-  
1199 ety for Industrial and Applied Mathematics, 2002. URL:  
1200 <http://epubs.siam.org/doi/book/10.1137/1.9780898718195>.  
1201 doi:10.1137/1.9780898718195.
- 1202 [50] C. Nathan, Neutrophils and Immunity: Challenges and Oppor-  
1203 tunities, *Nature Reviews Immunology* 6 (2006) 173–182. URL:  
1204 <https://www.nature.com/articles/nri1785>. doi:10.1038/nri1785.
- 1205 [51] S. Gordon, Alternative Activation of Macrophages,  
1206 *Nature Reviews Immunology* 3 (2003) 23–35. URL:  
1207 <http://www.nature.com/articles/nri978>. doi:10.1038/nri978.
- 1208 [52] C. T. Robb, K. H. Regan, D. A. Dorward, A. G. Rossi,  
1209 Key Mechanisms Governing Resolution of Lung Inflamma-  
1210 tion, *Seminars in Immunopathology* 38 (2016) 425–448. URL:  
1211 <https://link-springer-com.proxy.library.vcu.edu/article/10.1007/s00281-016-0560-6>.  
1212 doi:10.1007/s00281-016-0560-6.
- 1213 [53] V. Kumar, A. Sharma, Neutrophils: Cinderella of Innate Immune  
1214 System, *International Immunopharmacology* 10 (2010) 1325–1334. URL:  
1215 <http://www.sciencedirect.com/science/article/pii/S1567576910002663>.  
1216 doi:10.1016/j.intimp.2010.08.012.
- 1217 [54] L. K. Johnston, C. R. Rims, S. E. Gill, J. K. McGuire, A. M.  
1218 Manicone, Pulmonary Macrophage Subpopulations in the In-  
1219 duction and Resolution of Acute Lung Injury, *American Jour-  
1220 nal of Respiratory Cell and Molecular Biology* (2012). URL:  
1221 <http://www.atsjournals.org/doi/abs/10.1165/rcmb.2012-00900C>.  
1222 doi:10.1165/rcmb.2012-00900C.
- 1223 [55] C. Summers, S. M. Rankin, A. M. Condliffe, N. Singh, A. M.  
1224 Peters, E. R. Chilvers, Neutrophil Kinetics in Health and

- 1225 Disease, Trends in Immunology 31 (2010) 318–324. URL:  
1226 <http://www.sciencedirect.com/science/article/pii/S147149061000075X>.  
1227 doi:10.1016/j.it.2010.05.006.
- 1228 [56] S. M. Opal, V. A. DePalo, Anti-inflammatory cytokines, Chest 117  
1229 (2000) 1162–1172.
- 1230 [57] N. E. Vlahakis, M. A. Schroeder, A. H. Limper, R. D. Hub-  
1231 mayr, Stretch Induces Cytokine Release by Alveolar Epithe-  
1232 lial Cells in Vitro, American Journal of Physiology-Lung Cel-  
1233 lular and Molecular Physiology 277 (1999) L167–L173. URL:  
1234 <http://www.physiology.org/doi/abs/10.1152/ajplung.1999.277.1.L167>.  
1235 doi:10.1152/ajplung.1999.277.1.L167.
- 1236 [58] M. Heusinkveld, P. J. d. V. v. Steenwijk, R. Goedemans, T. H.  
1237 Ramwadhoebe, A. Gorter, M. J. P. Welters, T. v. Hall, S. H.  
1238 v. d. Burg, M2 Macrophages Induced by Prostaglandin E2 and IL-6  
1239 from Cervical Carcinoma Are Switched to Activated M1 Macrophages  
1240 by CD4+ Th1 Cells, The Journal of Immunology 187 (2011)  
1241 1157–1165. URL: <http://www.jimmunol.org/content/187/3/1157>.  
1242 doi:10.4049/jimmunol.1100889.
- 1243 [59] O. Soehnlein, L. Lindbom, Phagocyte partnership during the on-  
1244 set and resolution of inflammation, Nature Reviews Immunology 10  
1245 (2010) 427–439. URL: <https://www.nature.com/articles/nri2779>.  
1246 doi:10.1038/nri2779.
- 1247 [60] M. D. McKay, R. J. Beckman, W. J. Conover, Comparison of Three  
1248 Methods for Selecting Values of Input Variables in the Analysis of  
1249 Output from a Computer Code, Technometrics 21 (1979) 239–245.  
1250 doi:10.1080/00401706.1979.10489755.
- 1251 [61] S. Marino, I. B. Hogue, C. J. Ray, D. E. Kirschner, A methodology  
1252 for performing global uncertainty and sensitivity analysis in systems  
1253 biology, Journal of Theoretical Biology 254 (2008) 178–196. URL:  
1254 <http://www.sciencedirect.com/science/article/pii/S0022519308001896>.  
1255 doi:10.1016/j.jtbi.2008.04.011.
- 1256 [62] D. E. Kirschner, Matlab Functions for PRCC and eFAST, 2008. URL:  
1257 <http://malthus.micro.med.umich.edu/lab/usadata/>.

- 1258 [63] L. S. Smith, S. A. Gharib, C. W. Frevert, T. R. Martin, Effects  
1259 of Age on the Synergistic Interactions between Lipopolysaccha-  
1260 ride and Mechanical Ventilation in Mice, American Journal of  
1261 Respiratory Cell and Molecular Biology 43 (2010) 475–486. URL:  
1262 <https://www.atsjournals.org/doi/full/10.1165/rcmb.2009-00390C>.  
1263 doi:10.1165/rcmb.2009-00390C, publisher: American Thoracic Society  
1264 - AJRCMB.
- 1265 [64] E. K. Wolthuis, A. P. Vlaar, G. Choi, J. J. Roelofs, N. P. Juf-  
1266 fermans, M. J. Schultz, Mechanical ventilation using non-injurious  
1267 ventilation settings causes lung injury in the absence of pre-existing  
1268 lung injury in healthy mice, Critical Care 13 (2009) R1. URL:  
1269 <https://doi.org/10.1186/cc7688>. doi:10.1186/cc7688.
- 1270 [65] A. Saltelli, S. Tarantola, F. Campolongo, M. Ratto, Sensitivity Analysis  
1271 in Practice: A Guide to Assessing Scientific Models, John Wiley & Sons,  
1272 2004. Google-Books-ID: NsAVmohPNpQC.
- 1273 [66] A. Saltelli, R. Bolado, An alternative way to com-  
1274 pute Fourier amplitude sensitivity test (FAST), Computa-  
1275 tional Statistics & Data Analysis 26 (1998) 445–460. URL:  
1276 <http://www.sciencedirect.com/science/article/pii/S0167947397000431>.  
1277 doi:10.1016/S0167-9473(97)00043-1.
- 1278 [67] A. Saltelli, S. Tarantola, K. P.-S. Chan, A Quantitative  
1279 Model-Independent Method for Global Sensitivity Analysis  
1280 of Model Output, Technometrics 41 (1999) 39–56. URL:  
1281 <https://www.tandfonline.com/doi/abs/10.1080/00401706.1999.10485594>.  
1282 doi:10.1080/00401706.1999.10485594.
- 1283 [68] R. I. Cukier, C. M. Fortuin, K. E. Shuler, A. G. Petschek,  
1284 J. H. Schaibly, Study of the sensitivity of coupled reac-  
1285 tion systems to uncertainties in rate coefficients. I Theory,  
1286 The Journal of Chemical Physics 59 (1973) 3873–3878. URL:  
1287 <https://aip.scitation.org/doi/abs/10.1063/1.1680571>.  
1288 doi:10.1063/1.1680571.
- 1289 [69] J. H. Schaibly, K. E. Shuler, Study of the sensitivity of coupled  
1290 reaction systems to uncertainties in rate coefficients. II Applica-  
1291 tions, The Journal of Chemical Physics 59 (1973) 3879–3888.

- 1292 URL: <https://aip.scitation.org/doi/abs/10.1063/1.1680572>.  
1293 doi:10.1063/1.1680572.
- 1294 [70] D. C. Collins, R. Avissar, An Evaluation with the Fourier Ampli-  
1295 tude Sensitivity Test (FAST) of Which Land-Surface Parameters Are  
1296 of Greatest Importance in Atmospheric Modeling, *Journal of Climate* 7  
1297 (1994) 681–703.
- 1298 [71] J. Le, Decision Trees in R, 2018. URL:  
1299 <https://www.datacamp.com/community/tutorials/decision-trees-R>.
- 1300 [72] A. Liaw, M. Wiener, Classification and Regression by randomForest,  
1301 2002.
- 1302 [73] P. E. McKight, J. Najab, Kruskal-Wallis Test, in: *The Corsini En-*  
1303 *cyclopedia of Psychology*, American Cancer Society, 2010, pp. 1–1. URL:  
1304 <https://onlinelibrary.wiley.com/doi/abs/10.1002/9780470479216.corpsy0491>.  
1305 doi:10.1002/9780470479216.corpsy0491.
- 1306 [74] Y. Benjamini, Y. Hochberg, Controlling the false discovery rate: a  
1307 practical and powerful approach to multiple testing, *Journal of the*  
1308 *Royal statistical society: series B (Methodological)* 57 (1995) 289–300.

## Supplementary Material

|                                                                                                                                                                                     |             |             |             |             |
|-------------------------------------------------------------------------------------------------------------------------------------------------------------------------------------|-------------|-------------|-------------|-------------|
| A summary of the initial sates and disease progression outcomes and how they change, depending on the maximum initial amount of Ee allowed (exclusion group).                       |             |             |             |             |
|                                                                                                                                                                                     |             |             |             |             |
| Initial condition criteria:                                                                                                                                                         |             | Ee(0)<75%   | Ee(0)<50%   | Ee(0)<25%   |
|                                                                                                                                                                                     |             |             |             |             |
| Total number of sets that reached steady-state:                                                                                                                                     |             | 23433       | 23086       | 22217       |
|                                                                                                                                                                                     |             |             |             |             |
|                                                                                                                                                                                     | Healthy IC: | 15890 (438) | 15890 (438) | 15890 (428) |
|                                                                                                                                                                                     | Health ES:  | 15454 (2)   | 15453 (1)   | 15452 (0)   |
|                                                                                                                                                                                     |             |             |             |             |
| Moderate inflammation IC:                                                                                                                                                           |             | 5090 (101)  | 5090 (101)  | 4433 (37)   |
| Moderate inflammation ES:                                                                                                                                                           |             | 5320 (331)  | 5319 (330)  | 4726 (330)  |
|                                                                                                                                                                                     |             |             |             |             |
| Severe inflammation IC:                                                                                                                                                             |             | 2453 (2)    | 2106 (0)    | 1894 (0)    |
| Severe inflammation ES:                                                                                                                                                             |             | 2659 (208)  | 2314 (208)  | 2039 (145)  |
|                                                                                                                                                                                     |             |             |             |             |
|                                                                                                                                                                                     |             |             |             |             |
| Numbers in parentheses are the number of sets that leave the state and enter the state at the end of the simulation for initial condition (IC) and ending state (ES), respectively. |             |             |             |             |
|                                                                                                                                                                                     |             |             |             |             |

| <b>Top Correlations</b>                                                                                                                        |                     |           |           |
|------------------------------------------------------------------------------------------------------------------------------------------------|---------------------|-----------|-----------|
| The parameters that have the highest correlation with parameters and other predictors, for each exclusion group and disease progression group. |                     |           |           |
|                                                                                                                                                |                     |           |           |
| Criteria:                                                                                                                                      | Ee(0)<75%           | Ee(0)<50% | Ee(0)<25% |
|                                                                                                                                                | kmne, Eh ratio 0.5h |           |           |
| Healthy                                                                                                                                        | 0.1                 | 0.1       | 0.1       |
| Pers. inf.                                                                                                                                     | 0.67                | 0.67      | 0.66      |
| Severe inf.                                                                                                                                    | 0.82                | 0.82      | 0.81      |
|                                                                                                                                                |                     |           |           |
|                                                                                                                                                | br, Eh ratio 0.5h   |           |           |
| Healthy                                                                                                                                        | 0.29                | 0.29      | 0.29      |
| Pers. inf.                                                                                                                                     | 0.41                | 0.41      | 0.42      |
| Severe inf.                                                                                                                                    | 0.28                | 0.37      | 0.41      |
|                                                                                                                                                |                     |           |           |
|                                                                                                                                                | sm, max M2          |           |           |
| Healthy                                                                                                                                        | 0.32                | 0.32      | 0.32      |
| Pers. inf.                                                                                                                                     | 0.3                 | 0.3       | 0.31      |
| Severe inf.                                                                                                                                    | 0.32                | 0.3       | 0.31      |

| <b>Significance Testing</b>                                                                                                                                                            |                  |                |                  |
|----------------------------------------------------------------------------------------------------------------------------------------------------------------------------------------|------------------|----------------|------------------|
| Parameters and other predictors that show a statistically significant difference (p-value<0.01) between all three disease progression groups, using Kruskal-Wallis and Wilcoxon tests. |                  |                |                  |
|                                                                                                                                                                                        |                  |                |                  |
| Criteria:                                                                                                                                                                              | Ee(0)<75%        | Ee(0)<50%      | Ee(0)<25%        |
| Significant predictors:                                                                                                                                                                | kmne             | kmne           | kmne             |
|                                                                                                                                                                                        | xmne             | xmne           | xmne             |
|                                                                                                                                                                                        | br               | br             | br               |
|                                                                                                                                                                                        | ken              | ken            | ken              |
|                                                                                                                                                                                        | min M1%          | min M1%        | min M1%          |
|                                                                                                                                                                                        | Eh ratio at 2h   |                |                  |
|                                                                                                                                                                                        | M1 peak time     | M1 peak time   |                  |
|                                                                                                                                                                                        | Eh ratio at 0.5h |                |                  |
|                                                                                                                                                                                        | kem1             | kem1           | kem1             |
|                                                                                                                                                                                        | M1 peak ratio    |                |                  |
|                                                                                                                                                                                        | M2 peak time     | M2 peak time   | M2 peak time     |
|                                                                                                                                                                                        | kan              | kan            |                  |
|                                                                                                                                                                                        |                  | kep            |                  |
|                                                                                                                                                                                        |                  | M1 peak ratio  | M1 peak ratio    |
|                                                                                                                                                                                        |                  | Eh ratio at 6h | Eh ratio at 6h   |
|                                                                                                                                                                                        |                  | min.m1         |                  |
|                                                                                                                                                                                        |                  |                | Eh ratio at 0.5h |
|                                                                                                                                                                                        |                  | xnup           | xnup             |

| <b>Random Forest Decision Tree</b>                                           |                  |                  |                  |
|------------------------------------------------------------------------------|------------------|------------------|------------------|
| Ten highest average importance values, as determined by 1000 random forests. |                  |                  |                  |
|                                                                              |                  |                  |                  |
| Criteria:                                                                    | Ee(0)<75%        | Ee(0)<50%        | Ee(0)<25%        |
| Top ten, in order:                                                           | kmne             | kmne             | kmne             |
|                                                                              | xmne             | xmne             | xmne             |
|                                                                              | Eh ratio at 6h   | Eh ratio at 6h   | Eh ratio at 2h   |
|                                                                              | Eh ratio at 2h   | Eh ratio at 2h   | Eh ratio at 6h   |
|                                                                              | Eh ratio at 0.5h | Eh ratio at 0.5h | Eh ratio at 0.5h |
|                                                                              | br               | br               | br               |
|                                                                              | min M1           | min M1           | min M1           |
|                                                                              | ken              | ken              | ken              |
|                                                                              | kep              | min M1%          | min M1%          |
|                                                                              | min M1%          | kep              | kem1             |
|                                                                              |                  |                  |                  |
|                                                                              |                  |                  |                  |
